# 1 H3K9me2 genome-wide distribution in 2 the holocentric insect *Spodoptera* 3 *frugiperda* (Lepidoptera: Noctuidae)

4 Sandra Nhim<sup>1</sup>, Sylvie Gimenez<sup>1</sup>, Rima Nait-Saidi<sup>1</sup>, Dany Severac<sup>2</sup>, Kiwoong Nam<sup>1</sup>,  
5 Emmanuelle d'Alençon<sup>1</sup> & Nicolas Nègre<sup>1#</sup>

6

7 <sup>1</sup> DGIMI, Univ Montpellier, INRAE, Montpellier, France

8 <sup>2</sup> MGX, Univ Montpellier, CNRS, INSERM, Montpellier, France

9

10 # to whom correspondence should be addressed: [nicolas.negre@umontpellier.fr](mailto:nicolas.negre@umontpellier.fr)

## 11 Abstract

12 Background: Eukaryotic genomes are packaged by Histone proteins in a structure called  
13 chromatin. There are different chromatin types. Euchromatin is typically associated with  
14 decondensed, transcriptionally active regions and heterochromatin to more condensed regions  
15 of the chromosomes. Methylation of Lysine 9 of Histone H3 (H3K9me) is a conserved  
16 biochemical marker of heterochromatin. In many organisms, heterochromatin is usually  
17 localized at telomeric as well as pericentromeric regions but can also be found at interstitial  
18 chromosomal loci. This distribution may vary in different species depending on their general  
19 chromosomal organization. Holocentric species such as *Spodoptera frugiperda* (Lepidoptera:  
20 Noctuidae) possess dispersed centromeres instead of a monocentric one and thus no  
21 observable pericentromeric compartment. To identify the localization of heterochromatin in  
22 such species we performed ChIP-Seq experiments and analyzed the distribution of the  
23 heterochromatin marker H3K9me2 in the Sf9 cell line and whole 4<sup>th</sup> instar larvae (L4) in relation  
24 to RNA-Seq data.

25

26 Results: In both samples we measured an enrichment of H3K9me2 at the (sub) telomeres,  
27 rDNA loci, and satellite DNA sequences, which could represent dispersed centromeric regions.  
28 We also observed that density of H3K9me2 is positively correlated with transposable elements  
29 and protein-coding genes. But contrary to most model organisms, H3K9me2 density is not  
30 correlated with transcriptional repression.

31

32 Conclusion: This is the first genome-wide ChIP-Seq analysis conducted in *S. frugiperda* for  
33 H3K9me2. Compared to model organisms, this mark is found in expected chromosomal  
34 compartments such as rDNA and telomeres. However, it is also localized at numerous

35 dispersed regions, instead of the well described large pericentromeric domains, indicating that  
36 H3K9me2 might not represent a classical heterochromatin marker in *Lepidoptera*.  
37 (242 words)

38

39 **Keywords:** heterochromatin, H3K9me2, *Spodoptera frugiperda*, holocentrism, ChIP-Seq

## 40 Introduction

41 The nuclear organization of the genome into chromatin is a hallmark of eukaryotes. DNA is  
42 wrapped around histone proteins to form nucleosomes that constitute basic units of chromatin  
43 (Luger et al. 1997). Two types of chromatin are classically described based on the compaction  
44 of nucleosomes along the genome. The euchromatin represents “open” and less compacted  
45 chromatin structures and is usually associated with active gene transcription. On the other  
46 hand, heterochromatin designates regions of the chromosomes that are more compact, with a  
47 higher nucleosome density (Heitz, 1928). Genes within heterochromatin are regarded to be  
48 transcriptionally repressed.

49

50 Several types of heterochromatin have been described. Constitutive heterochromatin (c-Het),  
51 contrary to facultative heterochromatin, remains persistently compacted despite cell cycle and  
52 developmental stages, environmental states or even studied species (Dillon 2004; Allshire et  
53 Madhani 2018; Janssen, Colmenares, et Karpen 2018). It is usually located at important  
54 chromosomal features such as telomeres, rDNA loci and pericentromeric regions (Riddle et al.  
55 2011). Those regions are usually gene poor and transcriptionally silenced (Dillon 2004; Allshire  
56 et Madhani 2018). Understood as a genomic safety guard from transposons (Janssen,  
57 Colmenares, et Karpen 2018), c-Het associated regions are often enriched in repeated  
58 sequences such as satellite DNA and transposable elements. The transcriptional silencing by  
59 c-Het is due to its compaction which is achieved by chemical modifications of histones. The  
60 classical marker of c-Het in all eukaryotes is the post translational methylation of the lysine 9  
61 of Histone H3 (H3K9me) (Kharchenko et al. 2011; Liu et al. 2011; Ho et al. 2014). This  
62 methylation mark deposited by SET domain proteins such as Su(var)3-9 (Rea et al. 2000) and  
63 G9a (M. Tachibana et al. 2001; Makoto Tachibana et al. 2002; Kondo et al. 2008) is recognized  
64 by chromo-domain containing proteins belonging to HP1s family (Minc et al. 1999; Lachner et  
65 al. 2001; Maison et Almouzni 2004; Lomberk, Wallrath, et Urrutia 2006). HP1 proteins  
66 assemble as homodimers to form the ultrastructural 3D compaction detected by cytology  
67 (Verschure et al. 2005). This compaction impairs the binding of other DNA associated proteins  
68 such as transcription factors and RNA polymerases, which explains the repressive effect of  
69 heterochromatin. These properties of c-Het have been well described in model organisms,  
70 from yeast to mammals and thus are thought to be conserved.

71

72 With developments of sequencing, biochemical methods and growing interest for non-model  
73 organisms (Tagu, Colbourne, et Nègre 2014), the classical c-Het features are being  
74 reconsidered (Grewal et Jia 2007). Underlying DNA sequences can show rapid turnover, a fact

75 particularly true for centromeres (Henikoff, Ahmad, et Malik 2001). Depending on cell cycle  
76 phases, nascent non coding RNAs from telomeres and pericentromeres contribute to the  
77 regulation of their biology (Bierhoff, Postepska-Igielska, et Grummt 2014; Allshire et Madhani  
78 2018). H3K9me distribution has been shown to vary and dynamic apposition of histone marks  
79 has also been reported outside of primary c-Het regions (Wen et al. 2009) in heterochromatin  
80 “islands” (Riddle et al. 2011; Lee et al. 2020). In human and mouse, interstitial domains called  
81 LOCKS, spanning several Mb, dynamically switch to heterochromatin state, marked by Lysine  
82 9 methylation, in specialized cells, supposedly to limit pluripotency (Wen et al. 2009; Madani  
83 Tonekaboni, Haibe-Kains, et Lupien 2021). Beside these controlled variations, c-Het can  
84 unpredictably change in terms of associated proteins or even DNA sequences. This causes  
85 several defects in development or represent molecular basis of hybrid incompatibilities  
86 between close species (Ferree et Barbash 2009; Hughes et Hawley 2009; Johnson 2010;  
87 Crespi et Nosil 2013; Satyaki et al. 2014).

88

89 While most studies on c-Het have been performed on monocentric species, a particular case  
90 of c-Het dynamic is found in holocentric organisms. Their chromosomes have no cytological  
91 hypercompacted regions and possess dispersed centromeres instead of unique ones per  
92 chromosome (Schrader 1935). Classical heterochromatin compartmentation and properties  
93 are thought to be absent. Holocentrism has been described in several plants, in some  
94 nematodes and some insect orders (Wolf 1996; Drinnenberg et al. 2014). Phylogenetic  
95 analysis indicates that holocentric species might have derived several times from monocentric  
96 species by convergent evolution (Melters et al. 2012; Escudero, Márquez-Corro & Hipp 2016).  
97 This is supported by different centromeric molecular signatures between holocentric species.  
98 In monocentric species, major 150bp satellite forming centromeres are packaged in CenH3  
99 rich nucleosomes that are encompassed by peripheral H3K9me<sub>2/3</sub> regions (Melters et al.  
100 2013; Drinnenberg et al. 2014). But, except for the plant *Rhynchospora pubera* (Marques et al.  
101 2015), described holocentric species have lost those centromeric repeated sequences. CenH3  
102 is present in nematodes (Gassmann et al. 2012; Steiner et Henikoff 2014) and in plants (Zedek  
103 et Bureš 2016; Oliveira et al. 2020) but has been lost in other holocentric insects (Drinnenberg  
104 et al. 2014). A recent study proposed that in Lepidopteran, CenH3 function has been replaced  
105 by H3K27me<sub>3</sub>, a facultative heterochromatin mark (Senaratne et al. 2021). More importantly  
106 H3K9me<sub>2</sub> signal surrounding centromeres is thought to be lost in these organisms, unlike  
107 holocentric *C.elegans* (Steiner et Henikoff 2014). Previous studies conducted on Lepidopteran  
108 showed nonetheless that H3K9me<sub>2</sub> is still associated to repeated DNA at rDNA loci and sexual  
109 chromosomes (Stanojic et al. 2011; Borsatti et Mandrioli 2013).

110

111 In this paper, we aim to clarify H3K9me<sub>2</sub> heterochromatin distribution in *Spodoptera frugiperda*  
112 (Lepidoptera: Noctuidae), a crop pest causing severe damages to plants at larval stage. Since  
113 the *S. frugiperda* distribution area has recently been extended from the American continent to  
114 a worldwide invasion (Goergen et al. 2016), there is an urge to understand its adaptive potential  
115 when confronted with new ecosystems. In particular, chromatin properties could influence  
116 phenotypic plasticity in response to environmental conditions (Simola et al. 2016; Gibert et al.  
117 2016). *S.frugiperda* constitutes also an emergent epigenetic model organism with published

118 reference genomes for different strains and cell lines (Kakumani et al. 2014; Nandakumar, Ma,  
119 et Khan 2017; Gouin et al. 2017; Nam et al. 2020; L. Zhang et al. 2020), histone modifications  
120 and non-coding RNAs being previously characterized (Stanojcic et al. 2011; d'Alençon et al.  
121 2011; Moné et al. 2018) as well as a growing body of RNA-Seq data (Orsucci et al. 2020).  
122 Another advantage lies in the well-established Sf9 cell line, derived from *S. frugiperda* ovarian  
123 tissues, providing non limiting material for biochemical assays (Vaughn et al. 1977). We  
124 performed H3K9me2 ChIP-Seq and RNA-Seq on two different samples: Sf9 cell lines and  
125 whole 4th instar larvae (L4). In both samples, we confirmed the association of H3K9me2 at c-  
126 Het domains such as telomeres, rDNA locus and satellite sequences that might represent  
127 vestigial centromeres. We found a strong association of H3K9me2 with repeat elements as  
128 well as gene bodies. And we show that H3K9me2 enrichment at these elements is not  
129 associated with transcriptional repression or activation, raising the question of its role in  
130 chromosomal organization in holocentric lepidopteran.

131

## 132 Material and Methods

133

### 134 ***Spodoptera frugiperda* rearing and Sf9 cell line maintenance**

135 L4 insects have been raised in controlled laboratory conditions of 16h:8h light/dark photoperiod  
136 cycle, ~40 % mean hygrometry and ~24°C temperature. The insects derived from pupae  
137 individuals collected in 2001 in Guadeloupe. This laboratory population corresponds to  
138 previously published reference genome assemblies (Gouin et al. 2017; Nam et al. 2020).

139 Immortalized Sf9 cell line derived from *S. frugiperda* ovarian tissues (Vaughn et al. 1977). The  
140 cell line was acquired from ATCC (<https://www.atcc.org/products/crl-1711>) and has been  
141 cultured following the manufacturer protocol recommendations.

142

### 143 **Western blot**

144 Chromatin extracts were prepared from Sf9 cells and L4 insects as described below fro the  
145 ChIP procedure. Total proteins have been first quantified by colorimetric Bradford method and  
146 equivalent quantities were used for a 15% SDS/PAGE. After migration, proteins from the gel  
147 were transferred onto a PVDF membrane. The membrane was incubated overnight with  
148 mouse monoclonal H3K9me2 antibody (Abcam 1220) and revealed with an ECL kit.

149

### 150 **Immunofluorescence on Sf9 cell lines**

151 Sf9 cells were grown to confluence with standard Schneider medium, then scraped and  
152 collected in 50 mL Falcon tubes. Cells were then diluted up to 3.10<sup>5</sup> cells/ml and 1 mL was  
153 used for each immunostaining condition for 1 well of a 12-well plate. Plates with round glass  
154 coverslips and 1 mL of cell dilution were then placed at 28 °C for 4 h, allowing the cells to  
155 sediment on the coverslip. The culture medium was then removed, plates washed with 1X PBS  
156 and fixed with paraformaldehyde 4%, 20 min at room temperature. Coverslips were rinsed  
157 twice with PBS before processing with immunostaining.

158 For immunostaining, coverslips in the plates were permeabilized with 1 mL of PBS 1X + Triton  
159 1% per well for 30 min at room temperature. The solution was removed, and the cells were  
160 blocked with PBS 1X + BSA 1% for 30 min at room temperature. The solution was removed  
161 and staining with the primary antibody (anti-H3K9m2, Abcam 1220) diluted in PBS-BSA 0.1 %  
162 was performed. We used 1/100 and 1/200 dilutions (50 µL / well) and we kept a control non-  
163 treated well. Incubation was done 1 h at room temperature. Primary antibody was rinsed twice  
164 in PBS 1X before adding the secondary antibody (anti-mouse Alexa568) diluted 1/500 in PBS  
165 1X – BSA 0.1% (~100 µL per well) 30-45 min at room temperature in the dark. Still in the dark,  
166 coverslips were rinsed once in PBS 1X, then incubated with DAPI (1mg/mL diluted 1/1000 per  
167 condition) for 5 minutes and rinsed again. Coverslips were then mounted on a microscopy slide  
168 with 1 drop of ProLong Antifade Mountant (ThermoFischer Scientific) and after 30min, sealed  
169 with transparent nail polish. Slides were kept in the dark at 4°C until observation with an  
170 Apotome microscope (Zeiss).

171

### 172 **ChIP-Seq and RNA-Seq**

173 We performed ChIP-Seq following an adapted protocol by Nègre et al. 2006 on 4th instar whole  
174 larvae and Sf9 cell culture.

175 Briefly, biological samples are being crushed in a douncer, in presence of 1% formaldehyde  
176 and incubated for 15 minutes to allow protein-DNA crosslinking. Crosslinking was quenched  
177 by the addition of 225mM glycine. Chromatin was then fragmented using a Bioruptor sonicator  
178 (Diagenode). An aliquot of sonicated chromatin at this stage is used as the Input sample.

179 For the immunoprecipitation, sonicated chromatin is incubated for 4 h with the primary antibody  
180 at 4°C, then with Protein-A sepharose beads (CL4B) for again 4 h. Beads were then centrifuged  
181 and washed. Chromatin was eluted from the beads with a 50mM Tris-HCl buffer with 1%SDS  
182 and 10mM EDTA. To reverse the cross-linking, this immuno-precipitate was incubated  
183 overnight at 65°C and then 2-3h at 50°C with proteinase K. DNA was purified from this  
184 precipitate with 500µL of phenol-chloroform and 55µL of 4M LiCl. The DNA from the aqueous  
185 phase is precipitated with 100% ethanol and the pellet dried and resuspended in water.  
186 Chromatin was prepared from 50 L4 larvae pool and 50 mL of confluent cells per IP condition.  
187 Two biological replicates for input and ChIP conditions have been systematically produced  
188 except for larvae (1 replicate only). Genetic material sequenced in 50bp single-end (Illumina-  
189 seq technology).

190 We also performed RNA-Seq experiments from Sf9 cell lines. RNA was purified using TRIzol  
191 (Invitrogen) following manufacturer's instructions and sent to Genewiz for strand-oriented,  
192 mRNA sequencing. Previously published RNA-Seq data for L4 (Orsucci et al. 2020) genomes  
193 were used to perform combined analysis.

194 Datasets are available in ArrayExpress (<https://www.ebi.ac.uk/arrayexpress/>) with the following  
195 accession numbers: E-MTAB-6540 for L4 RNA-Seq; E-MATB-10686 for Sf9 RNA-Seq and E-  
196 MTAB-10721 for ChIP-Seq experiments.

197

### 198 **H3K9me2 ChIP-Seq analysis**

199 Raw reads from fastq files have been filtered using cutadapt software and trimmed for  
200 remaining adapters, low quality (phredscore < 35) and short length sequences (<40nt).  
201 Corresponding samples alignments were performed using stringent parameters with Bowtie2  
202 (--endtoend --very-sensitive, Langmead et al. 2009) against Sf9 (Nandakumar, Ma, et Khan  
203 2017) and L4 genomes (Nam et al. 2020). Samtools have been used for sample concatenation  
204 (Li et al. 2009) after Deeptools -bigwigcorrelate Pearson analysis (Ramírez et al. 2016).  
205 H3K9me2 whole genome peak detection has been assessed with MACS2 callpeak using the  
206 following parameters: --broadpeak -f BAM -g 340000000 -n --down-sample (Y. Zhang et al.  
207 2008). Peaks were annotated using Bedtools software (--intersect) after functional annotation  
208 of genomic elements. Nucleotide peak comparison between the two models have been  
209 performed using online D-genies software (Cabanettes et Klopp 2018).

210 H3K9me2 plot and heatmap over genomic location of interests were produced from Deeptools  
211 (computeMatrix and plotHeatmap option).

212 Integrative Genomic Viewer (IGV) was used for annotation and sequencing track visualization  
213 (Thorvaldsdóttir, Robinson, et Mesirov 2013).

214

### 215 **Genome functional element annotation**



216 We used published *S. frugiperda* transcriptome (Legeai et al. 2014) for Sf9 and L4 gene  
217 annotations using Scipio software (Keller et al. 2008). It predicts gene exons by detecting  
218 intron/exon junctions with the BLAT algorithm. CDS were reconstructed using Bedtools --  
219 groupby function. Introns were annotated by subtracting CDS-exons positions (Bedtools --  
220 subtract).

221 RNA-Seq data were filtered, concatenated and aligned on the genome with the same methods  
222 as described for H3K9me2 ChIP-Seq samples. Expression analysis has been performed with  
223 Stringtie software (Pertea et al. 2015; parameter: stringtie 'bam files' -G genereference.gtf -e).  
224 Output in transcript per millions (TPM) was converted to log2 to determine active pool genes  
225 ( $\log_2(\text{TPM}) > 1$ ) from inactive ones ( $\log_2(\text{TPM}) \leq 1$ ). Since UTRs detections failed after several  
226 software tests (such as Maker, exUTR, getUTR or KLEAT), we arbitrarily defined 3'UTRs to be  
227 500pb long succeeding last exon (bedtools flank -l 0 -r 500 -s), 5'UTRs to be 200 bp long  
228 preceding first exon (bedtools flank -l 200 -r 0 -s) and promoters to be 1000bp long preceding  
229 5'UTRs.

230 Satellite DNA has been detected using TandemRepeatFinder (Benson 1999), Repeatexplorer  
231 (Novák et al. 2013) and Repeatmasker on both genomes. Major 150bp satellite regions were  
232 shuffled using Bedtools --shuffle option.

233 We characterized repeat DNA with consensus sequence inferior or equal to 10 base pairs as  
234 microsatellites. Those comprising [10-100]bp where qualified as minisatellites. Finally,  
235 consensus sequence satellite of over 100 bp were annotated as satDNA.

236 We used blastn with default parameters to annotate transposable elements in Sf9 and L4  
237 genomes, using previously determined transposable elements consensus sequences from *S.*  
238 *frugiperda* (Gouin et al., 2017) annotated by the REPET pipeline (Quesneville et al., 2005,  
239 sequences with less than 70 % homology were filtered out), rDNA copies (with a minimum of  
240 1000 nucleotides length (Gouin et al., 2017)) and telomeres (Gong et al. 2015) in *Spodoptera*  
241 genus.

242

### 243 **Statistic and graphic productions**

244 Barplot, scatterplot, histogram and Venn Diagram were plotted using R software. Student t-  
245 test and Chi-square test were performed using R software. Gene ontology enrichment has  
246 been performed using BLAST2GO annotations followed by Fisher exact test analysis (Conesa  
247 et al. 2005).

248

## 249 Results

250

### 251 1. H3K9me2 genome-wide distribution in Sf9 and L4 genomes

252

253 To investigate the presumptive genome-wide localization of heterochromatin and its dynamic  
254 in *S.frugiperda*, we performed ChIP-Seq experiments against the H3K9me2 chromatin mark in  
255 Sf9 cells as well as in L4 caterpillars. We first tested the specificity of the mouse anti-H3K9me2  
256 antibody (ab:1220) by immunofluorescence experiments in Sf9 cells. We observed a strong  
257 nuclear signal that disappears during metaphase (**Supplementary Fig. 1**). This is a well-known  
258 characteristic of this mark, which is usually shielded by Histone H3 Serine 10 Phosphorylation  
259 during mitosis (Duan et al. 2008; Jeong et al. 2010; Poleshko et al. 2019). We also performed  
260 western-blot on chromatin samples showing a 17kDa band corresponding to the mark in both  
261 samples (**Supplementary Fig. 2**). We then performed ChIP-Seq experiments following an  
262 adapted cross-linking procedure for our insect model (see **Methods**). For each experimental  
263 condition (input vs. ChIP-Seq, Sf9 vs. L4) we sequenced two biological replicates, except for  
264 L4 input.

265 After removing short and bad quality sequences, reads were mapped against respective  
266 reference genomes for Sf9 cell lines (Nandakumar, Ma, et Khan 2017) and L4 *S.frugiperda*  
267 larvae (Nam et al. 2020) (**Table 1**). The alignment rates range between 86.44% and 96.53%.  
268 Interestingly, both Sf9 and L4 ChIP-Seq shows a higher level of multimappers (reads mapping  
269 more than once) compared to input (**Table 1**). Indeed, a strong association between H3K9me2  
270 and repeated sequences has been found previously described in Lepidopteran (Stanojcic et  
271 al. 2011; Borsatti et Mandrioli 2013). Multimappers number is higher in Sf9 than in L4. This can  
272 be explained by Sf9 polyploidy (Jarman-Smith et al. 2002) or independent Sf9 and L4  
273 sequencing and bioinformatic genome assemblies (Nandakumar, Ma, et Khan 2017; Nam et  
274 al. 2020).

275



**Table 1 : Input and H3K9me2 ChIP-seq sequencing properties in Sf9 cells and L4 larvae.**

Raw, filtered reads and their alignments using Bowtie2 software.

| Cellular model                                                                                       | Experimental condition     | Raw reads  | Filtered reads | Unmapped reads | Reads that mapped 1x | Reads that mapped >1x | Alignment rate |
|------------------------------------------------------------------------------------------------------|----------------------------|------------|----------------|----------------|----------------------|-----------------------|----------------|
| <br>Sf9 cells       | Input (1st replicate)      | 75 090 638 | 42 741 167     | 9.36%          | 46.68%               | 43.96%                | <b>90.64%</b>  |
|                                                                                                      | Input (2nd replicate)      | 75 316 171 | 19 139 206     | 8.91%          | 48.55%               | 42.54%                | <b>91.09%</b>  |
|                                                                                                      | H9K9me2 IP (1st replicate) | 83 482 976 | 62 540 058     | 3.47%          | 39.22%               | 57.31%                | <b>96.53%</b>  |
|                                                                                                      | H9K9me2 IP (2nd replicate) | 35 949 262 | 23 372 459     | 3.67%          | 41.48%               | 54.85%                | <b>96.33%</b>  |
| <br>L4 stage larvae | Input (1st replicate)      | 44 093 818 | 41 023 357     | 12.42%         | 70.15%               | 17.43%                | <b>87.58%</b>  |
|                                                                                                      | H9K9me2 IP (1st replicate) | 35 076 920 | 30 539 878     | 13.56%         | 60.03%               | 26.40%                | <b>86.44%</b>  |
|                                                                                                      | H9K9me2 IP (2nd replicate) | 38 039 481 | 31 333 074     | 12.35%         | 60.61%               | 27.04%                | <b>87.65%</b>  |

276

277

278

279

280

281

282

283

284

285

286

287

288

289

290

291

292

293

294

295

296

297

298

299

300

301

302

303

When we tested the similarity of reads enrichment per genomic positions between samples (**Supplementary Fig. 3** and detailed in **Methods**) we observed that Pearson correlation R coefficient is higher between ChIP samples (R=0.65 for Sf9; R=0.85 for larvae) than between Input samples (R=0.44 in larvae), a result consistent with independently sonicated samples.

Since ChIP-Seq and input data segregate separately in both samples (**Supplementary Fig. 3**), we concatenated corresponding replicates and analyzed H3K9me2 enrichment by comparing ChIP-Seq over input. Respectively 35 596 and 30 382 peaks of enrichment were found in Sf9 and L4 samples. Half of them were small peaks comprising 0 to ~1000bp, whereas the other half formed larger genomic domains (comprising between ~1000bp to several 10 000 bp, **Fig. 1A-B**). Interestingly, H3K9me2 covers  $13.8 \pm 0.02\%$  and  $12.6 \pm 0.03\%$  of total Sf9 and L4 genome size. Since our results show relatively equivalent peaks in terms of abundance, distribution length and genomic proportion, we compared raw DNA sequence peak composition (described in **Methods**) between Sf9 and L4 samples. This analysis retrieved only 11% of homologous peaks in the best case (**Supplementary Fig. 4**). In order to analyze genome-wide distribution of H3K9me2 enriched domains between samples, we proceeded to the systematic annotation of genes in both *S.frugiperda* and Sf9 genomes, but also the annotation of repeated DNA, including telomeres, rDNA loci as well as transposable elements and satellite DNA (see **Methods, Supplementary Table 1**). We produced RNA-Seq replicates for Sf9 (see **Methods**) and reanalyzed published RNA-Seq data of L4 (Orsucci et al., 2020) to distinguish a pool of inactive genes from active ones by  $\log_2(\text{TPM})$  expression (**Supplementary Fig. 5** and **Supplementary Table 2**).

Our results show a comparable profile of H3K9me2 functional annotation over both genomes (**Fig. 1C-D**). The majority of the peaks were found associated with repeated sequences (overall of 34% and 42% in Sf9 and L4) followed by inactive genes (found respectively at 31% and 22% of H3K9me2 peaks). Surprisingly, 18% and 17% of H3K9me2 peaks were also detected within expressed genes. In addition, 17% and 19% peaks were present in intergenic regions.

304 While our global analysis gives clues about the general distribution of H3K9me2 in  
305 *S.frugiperda*, it failed to detect its expected association with telomeres or rDNA locus, with no  
306 enrichment found compared to broader regions such as repeated sequences and genes  
307 (**Supplementary Fig. 6**). As this result could be due to a very small fraction of telomeric and  
308 rDNA loci in the genome (~80 kb over 400 MB; **Supplementary Table 3 & 4**), we specifically  
309 analyzed the H3K9me2 distribution around the telomeric regions and rDNA locus (see Results  
310 section below) that we annotated in both reference sequences.

311

## 312 **2. H3K9me2 signal in telomeres repetitions**

313

314 In Noctuidae, the Lepidoptera family to which belongs the *S.frugiperda* species, chromosome  
315 pairs number is stably equal to 31 (Robinson 1971). Hence, consensual [TTAGG]<sub>n</sub> motif  
316 constituting telomeres is expected to be annotated at least 62 times in haploid genome  
317 assemblies (two tips per chromosome) (Gong et al. 2015; Vershinina, Anokhin, et Lukhtanov  
318 2015). We searched this motif within the Sf9 and L4 genomes, and respectively detected it in  
319 108 and 63 regions (**Supplementary Table 3**). For each presumptive telomeric region, we  
320 checked whether it was associated with any H3K9me2 peak. **Fig 2A** shows an example of  
321 homologous telomeres found in distinct Sf9 and L4 references. Homology was verified by the  
322 presence of the same upstream gene. Global analysis of these regions showed that 62 and 57  
323 copies were enriched in H3K9me2 over the 108 and 63 annotated, representing 57±9.3% and  
324 90±7.4% of Sf9 and L4 H3K9me2 telomere coverage (**Fig 2B**). In other biological models,  
325 ncRNA corresponding to telomeres have been found (Schoeftner et Blasco 2010). However,  
326 regardless of their length, [TTAGG]<sub>n</sub> motif sequences have almost no mapped transcripts in  
327 our samples (**Fig 2C**). Pearson correlation coefficient between RNA-Seq reads localization and  
328 telomere annotation confirms this tendency (for Sf9, R= -0.13 and for L4, R=0.002), as well as  
329 higher superior transcription state of active gene pools compared to telomeres (**Fig 2D**; Student  
330 t-test).

331

## 332 **3. H3K9me2 signal in rDNA locus**

333

334 Previous FISH cytology experiments conducted in Noctuidae showed the conservation of one  
335 rDNA locus located interstitially in an autosome (Nguyen et al. 2010). This polycistronic-like  
336 cluster is made of repeated 18S, 5.8S and 28S genes with additional 5S RNA being anti-sense  
337 included or extra located (Shaw et McKeown 2011). In case of low traductional activity, some  
338 rDNA copies are heterochromatinized with H3K9me2 mark (Srivastava, Srivastava, et Ahn  
339 2016). Like we did for telomere sequences, we compared H3K9me2 enrichment and  
340 transcription at rDNA loci. We searched both reference genomes for rDNA sequences and  
341 found one major locus in both, even though relatively shorter rDNA sequences and even larger  
342 ones can be detected at various places in the genome (**Supplementary Table 4**). The  
343 homologous rDNA regions in Sf9 and L4 genomes are highly transcribed with respective mean  
344 coverage values of 78.51 X and 320.7 X, even though RNA-Seq has been performed by mRNA  
345 enrichment through ribosomal DNA depletion (**Fig. 3A**). Intriguingly, we observed in Sf9 a co-  
346 occurrence of H3K9me2 enrichment and high RNA transcription (**Fig. 3A**, upper panel). This

347 counterintuitive result can be explained by sequence nature: since rDNA clusters are made of  
348 the same repeated sequences, short reads can align to heterochromatinized domains as well  
349 as euchromatic ones. Thus, if only one or few portions are H3K9me2 enriched in biological  
350 reality, every identical DNA sequence would be predicted as associated with the mark. The  
351 results are more coherent in L4 with RNA expression coinciding with absence of H3K9me2  
352 peak. rDNA expression is even found overexpressed when comparing the rDNA cluster to a  
353 pool of active genes (**Fig. 3B**, Student t-test, pvalue < 2.2x10e-16).

354

#### 355 **4. H3K9me2 enrichment around satellite DNA regions**

356

357 In many organisms, heterochromatin is associated with pericentromeric regions (Sullivan et  
358 Karpen 2004; Janssen, Colmenares, et Karpen 2018, **Supplementary Fig. 7**). These regions  
359 can be quite large, spanning several Mb of sequences (Riddle et al. 2011). We wondered  
360 whether heterochromatin in holocentric species is also associated with pericentric regions. To  
361 detect putative centromeres in *S.frugiperda*, we searched and annotated satellite DNA  
362 sequences (Subirana et Messeguer 2013). Indeed, a previous molecular evolution study  
363 conducted on 282 species showed that the most abundant 150bp satellite repetitions present  
364 in the genome correspond to centromeric DNA sequences (Melters et al. 2013). This was  
365 confirmed for the majority of monocentric organisms but contested for holocentric ones  
366 (Melters et al. 2013) with only *Rynchospora pubera* plant sharing this characteristic (Marques  
367 et al. 2015). We searched the most abundant 150bp satDNA in *S.frugiperda* and analyzed its  
368 chromosomal distribution, its transcriptional status and its peripheral H3K9me2 enrichment.  
369 Our analysis (see **Methods**) identified one 150bp satellite DNA (satDNA) consensus sequence  
370 shared between Sf9 and L4 (**Fig. 4A**). This repeated sequence is found in 1184 and 1238  
371 copies within Sf9 and L4 genomes respectively (**Fig. 4B**). These satDNA regions do not  
372 overlap any previously annotated functional sequences (telomere, rDNA, genes etc.). Their  
373 median length is between 280 and 291 base pairs, which could correspond to 2 nucleosomes.  
374 Transcription rates were found lower or similar to annotated telomeres or the pool of inactive  
375 genes in both references (**Fig. 4C**, Student t-test). Interestingly, H3K9me2 enrichment profile  
376 around satDNA was found similar in the two references with a systematic decrease of the mark  
377 inside candidate sequences opposing a broader adjacent signal. When candidate sequences  
378 are shuffled for genomic localization, no H3K9me2 enrichment is detected in and around  
379 regions of interest (**Supplementary Fig. 8**), confirming that H3K9me2 association with satDNA  
380 is not random. In both references, highest adjacent H3K9me2 peaks are stably found around  
381 1000bp from major 150bp satellites (**Fig. 4D**). While this result might indicate an association  
382 of heterochromatin with centromeric regions in holocentric species, additional studies would  
383 be needed to confirm that satDNA corresponds to *bona fide* centromeres in *S. frugiperda*.

#### 384 **5. H3K9me2 enrichment in repeat elements families**

385

386 Between 34% to 42 % of H3K9me2 peaks are associated with repeat sequences (**Fig. 1C,D**).  
387 We annotated in both reference genomes the different categories of repeat sequences,

388 whether they correspond to tandem repeats, such as micro- and mini- satellite sequences, or  
389 transposable elements (**Fig. 5A**). We found around a hundred thousand micro- and  
390 minisatellite sequences in both Sf9 and L4 genome assemblies, representing 3 674 661 / 2  
391 875 505bp and 1 706 018 / 1 149 269 bp each, or about 0.7% and 0.3% of the genome. We  
392 found less satellite sequence repeats (1719 and 3067 sequences) representing 0.5% and 0.2%  
393 of the genome but a large amount of putative transposable elements (46 625 and 55928  
394 sequences representing 6.7% and 9.8% of the genome).

395 We then calculated the proportion of each category associated with H3K9me2 (**Fig. 5A**). A  
396 higher proportion of satellite sequences and transposable elements is found associated with  
397 H3K9me2 compared to micro- and mini-satellite, which agrees with our expectation of a role  
398 of heterochromatin associated with repeat-rich regions of the genome.

399 The higher prevalence of repeat DNA and transposable elements in c-Het compartments in  
400 model organisms is often explained by the repressive nature of heterochromatin. Indeed,  
401 because of their potential deleterious effects on the genome when they are mobilized,  
402 transposable elements are often transcriptionally repressed by small RNA targeted H3K9me  
403 (Klenov et al. 2007; Sienski, Dönertas, et Brennecke 2012; Le Thomas et al. 2013). In order to  
404 determine if a similar role of H3K9me2 exists in *S. frugiperda*, we analyzed the RNA-Seq data  
405 from L4 tissues and Sf9 cells to classify transcribed and non-transcribed transposable  
406 elements and observe the association of each category with H3K9me2 signal (**Fig. 5B**). No  
407 enrichment was observed, with H3K9me2 being equally found between active and inactive  
408 transposable elements.

409

## 410 **6. H3K9me2 signal enrichment in genes**

411

412 Due to the classical repressive nature of heterochromatin, we expected H3K9me2 to be  
413 associated with mainly inactive genes. However, our ChIP-Seq analysis detected a  
414 comparable H3K9me2 enrichment in expressed genes compared to inactive ones in both  
415 references (**Fig. 1B**).

416 We analyzed if some gene regions like promoters, UTRs or gene bodies were more enriched  
417 in H3K9me2 than others (**Fig. 6A**). We found inactive promoters to be statistically more  
418 associated with H3K9me2 than active promoters in the two references (Sf9:  $\chi^2 = 317.37$ ,  $df =$   
419  $1$ ,  $p\text{-value} < 2.2e-16$ ; L4:  $\chi^2 = 667.97$ ,  $df = 1$ ,  $p\text{-value} < 2.2e-16$ ). However, 16% Sf9 and 26% L4  
420 active promoters were also associated with H3K9me2 marks, which may be due to the cell  
421 heterogeneity in both samples or to difficulties in promoter prediction in our model. H3K9me2  
422 is also detected within the gene body and UTRs regardless of the gene transcriptional status  
423 in equivalent proportions between Sf9 and L4 cells (**Fig. 6A**). Interestingly, when we took a  
424 further look into differently H3K9me2 enriched for gene body regions, we observed a more  
425 intense signal in exons compared to introns.

426 In Sf9 cells, 42.8% of annotated genes are associated with H3K9me2 and 39.1% in L4 (**Fig.**  
427 **6B**). For those genes, H3K9me2 signal is distributed within exons rather than introns (**Fig. 7**).  
428 Two-thirds of the H3K9me2 covered genes regardless of their transcription state are shared  
429 between the two references (**Fig. 6B**). For these common genes, we performed a Gene  
430 Ontology analysis. We observed an enrichment in functions associated with transposable

431 elements regulation (**Supplementary Fig. 9**, GO: endonuclease activity, nuclease activity) and  
432 nucleic acid homeostasis (**Supplementary Fig. 9**, GO: DNA metabolic process, catalytic  
433 activity acting on DNA etc.). We also noticed the presence of genes involved in  
434 heterochromatin maintenance and formation, suggesting possible molecular feedback. It  
435 includes a H3K9me methyltransferase enzyme (Suvar3/9: GSSPFG00004579001-PA, G9a :  
436 GSSPFG00019340001.2-PA), DNA methylase enzyme (DNMT1 (GSSPFG00025486001.2-  
437 PA)), centromere formation proteins (search from Cortes-Silva et al. 2020; inner kinetochore:  
438 CENP-P (GSSPFG00001205001-PA)), ATP synthase subunit (GSSPFG00010096001-PA;  
439 Collins et al. 2018), outer kinetochore :Nuf2 (GSSPFG00010779001-PA), BLAST2Go  
440 annotated centromeric proteins (GSSPFG00020169001-PA, GSSPFG00005386001.4-PA))  
441 and HP1 family proteins (HP1c (GSSPFG00011657001.2-PA),HP1e  
442 (GSSPFG00007777001.2-PA)). Paradoxically, lots of spliceosome genes involved in active  
443 transcription and mRNA formation are also found.

## 444 Discussion

445 We report the first H3K9me2 genome-wide ChIP-Seq analysis conducted in *S. frugiperda*, a  
446 Lepidopteran species. Our results are globally consistent with previous studies on H3K9me2  
447 (Ho et al. 2014) albeit with a higher percentage of genome covered ( $13.8\pm 0,02\%$  and  
448  $12,6\pm 0,03\%$  in Sf9 and L4) than in other monocentric and holocentric organisms. We detected  
449 H3K9me2 at expected chromosomal compartments such as telomeres and rDNA locus but no  
450 major centromeric locus. Instead, we observed a scattered distribution of H3K9me2 along the  
451 chromosomes colocalizing with genes and repeat elements, independent of their  
452 transcriptional status.

### 453 454 **Localization of H3K9me2 at expected heterochromatin compartments**

455  
456 In many monocentric organisms, c-Het is found in large regions surrounding the centromere.  
457 Since we found H3K9me2 to be still associated with heterochromatin domains such as  
458 telomeres or rDNA locus in *S. frugiperda* (**Fig. 2,3**), we hypothesized that c-Het could also  
459 identify putative centromeric regions in this holocentric specie. As mentioned in the  
460 introduction, H3K9me2 surrounding the major 150bp satDNA repetition is a conserved pattern  
461 for pericentric regions in monocentric species. To retrieve putative centromeric regions in the  
462 genome of *S. frugiperda*, we annotated the most abundant 150bp satDNA and found it present  
463 in more than a thousand scattered copies in both genomes (**Fig. 4**). Since we also observed  
464 an enrichment of H3K9me2 within 1kb of satDNA, we hypothesize they could represent  
465 holocentromeres. A recent publication on Lepidopteran cell lines (*Bombyx mori* and  
466 *Trichoplusia ni*) describes centromeres marked by the centromeric protein CenP-T to be  
467 unusually associated with the facultative heterochromatin mark H3K27me3 (Cortes-Silva et al.  
468 2020; Senaratne et al. 2021). However, the distribution of H3K9me2 was not assessed in their  
469 study and we don't know whether it colocalizes with H3K27me3 or is excluded. It is possible  
470 that satDNA sequences associated with H3K9me2 represent in fact vestigial centromeres that



471 stopped being used by the cell after H3K27me3 replacement. To determine if such genomic  
472 regions correspond to functional holocentromeres, its association with kinetochore proteins  
473 would have to be demonstrated.

474

### 475 **Repeated sequences and H3K9me2 association**

476

477 Among the conserved features of H3K9me2 distribution, we observed this mark to be mainly  
478 associated with repeated DNA sequences in both cellular references. This was evidenced by  
479 the high abundance of multimapper reads in both cellular references (**Table 1**) but also by the  
480 significant ChIP enrichment on the different categories of annotated repeated DNA (**Fig. 1C**).  
481 While this association was expected from previous studies conducted in Lepidopteran  
482 (Stanojic et al. 2011; Borsatti et Mandrioli 2013), we present here a more exhaustive  
483 association with the different categories of repeats. We did not observe a strong complete  
484 association of the mark with repeat elements with only 24% and 38% of transposable elements  
485 intersecting H3K9me2 peaks (**Fig. 5A**). In addition we did not observe a clear correlation  
486 between transposable elements repression and H3K9me2 as we were expecting (Klenov et al.  
487 2007, **Fig. 5B**). It is possible that other epigenetic marks might be involved to specifically  
488 repress transposable elements. Future genome-wide H3K27me3 or H3K9me1/3 ChIP-Seq  
489 data should be compared with H3K9me2 to determine if, in Lepidoptera, transposable  
490 elements control is insured by similar heterochromatin mechanisms as in other model insects.

491

### 492 **H3K9me2 association with genes bodies**

493

494 H3K9me2 in *S.frugiperda* is associated with some gene bodies regardless of their active or  
495 inactive transcriptional status (**Fig. 1B**). This histone mark has been described to cover coding  
496 sequences in two different situations.

497 The first situation corresponds to hundreds of genes that are present in c-Het compartments.  
498 Contrary to silenced euchromatic genes at heterochromatin proximity -an effect called position  
499 effect variegation (PEV, Wallrath et Elgin 1995)- these heterochromatic genes do not function  
500 when displaced in euchromatin (Yasuhara et Wakimoto 2008; Dimitri et al. 2009; Saha et al.  
501 2020). Their expression is compatible with H3K9me2 covering. Principally described in  
502 drosophila, some of these genes are essential for development and are mainly concentrated  
503 in pericentromeric regions. Given their localization, they are thought to be more prone to  
504 transposable elements insertions and show lots of intronic transposons. In *S.frugiperda*, we  
505 identified more than 4900 genes associated with the H3K9me2 mark. Their function reflects  
506 constitutive roles such as general transcription factors, ribosomal genes or mitochondrial  
507 genes, which fits with heterochromatic genes hypothesis.

508 The second situation described in the literature of H3K9me2 association with gene bodies is  
509 in alternative splicing. Presence of exonic H3K9me2 across genes is thought to slow down  
510 polymerase in order to favor alternative instead of constitutive mRNA transcription (Saint-André  
511 et al. 2011). Consistent with this, our analysis of H3K9me2 signal in *S.frugiperda* shows a  
512 higher enrichment in exons compared to introns (**Fig. 7**). In order to confirm a splicing role for  
513 this mark in *S.frugiperda*, it would be necessary to annotate exons nature (internal vs. external,



514 constitutive vs. alternative, etc.) and check if alternative mRNA transcripts are produced given  
515 presence or absence of exonic H3K9me2 signal. If previous studies focused on other  
516 heterochromatic components such as DNA methylation or HP1c proteins to regulate  
517 transcription and alternative splicing in insects (Bonasio et al. 2012; Li-Byarlay et al. 2013), no  
518 studies linking these epigenetic factors with H3K9me2 has been addressed in Lepidopteran.  
519 This fact is important since HP1c is usually described on both exons and introns. A recent work  
520 revealed intronic HP1c signal to be involved in alternative splicing through binding with  
521 abundant “CACACA” intronic repeated motif sequences (Rachez et al. 2019). Our search for  
522 a similar motif in *S.frugiperda* using two dedicated softwares failed to give the same results.  
523 But a systematic association of HP1c and H3K9me2 cannot be assessed since HP1c can bind  
524 to other modified marks and RNAs. In addition, the correspondence of classical HP1 proteins  
525 with homologs in Lepidoptera is not clear. In *Bombyx mori*, two HP1 homologs have been  
526 described: BmHP1a and BmHP1b (Mitsunobu et al. 2012). We also retrieved those two  
527 homologs in *S.frugiperda* genomes even though the phylogeny needs to be more resolved  
528 since they are not on the same branch as the classical *Drosophila* HP1a (**Supplementary Fig.**  
529 **10**).

## 530 Conclusion / Article summary

531 We produced the first genome-wide analysis of holocentric Lepidoptera *S. frugiperda*  
532 heterochromatin distribution by analyzing H3K9me2 ChIP-Seq data in two cell models. In  
533 contrast to studies suggesting unusual behavior of modified histones, our results supported a  
534 conserved pattern with invariant classic c-Het domains such as (sub)telomeres, rDNA locus  
535 and even peripheral major 150bp satDNA that could be associated with centromeric functions.  
536 However, we also advocate for a more pleiotropic function of H3K9me2 since it is abundantly  
537 present in transposable elements as well as gene bodies regardless of their expression status.  
538 In order to deepen these results and get a more detailed picture of heterochromatin localization  
539 in holocentric Lepidoptera, further work characterizing other associated histone marks, DNA  
540 methylation and HP1 proteins genome-wide distribution in Lepidoptera will be required.

## 541 Acknowledgements

542 This work was supported by a grant from the French National Research Agency (ANR-12-  
543 BSV7-0004-01; <http://www.agence-nationale-recherche.fr/>) for EA and Institut Universitaire de  
544 France for NN. The funding bodies had no role in the design of the study and collection,  
545 analysis, and interpretation of data and in writing the manuscript.

## 546 Authors Contributions

547 SN, EA and NN designed the project and the experiments, SG, SN and RNS performed the  
548 Western-Blot, Immuno-fluorescence and ChIP experiments, DS produced the Illumina libraries

549 and sequencing. SN produced the bioinformatic and statistical analysis with the help of KWN.  
550 SN and NN wrote the manuscript with the input of all co-authors.

## 551 Figures Legends

552 **Figure 1:** H3K9me2 genome-wide distribution in *S.frugiperda*.

553 **A-B:** Histograms representing H3K9me2 peaks lengths detected by MACS2 in Sf9 reference  
554 (A) and L4 reference (B).

555 **C-D:** Pie-chart showing compared abundance (%) of annotated H3K9me2 peaks (for repeated  
556 DNA, genes and intergenic regions) in Sf9 genome (C) and in L4 genome (D).

557

558 **Figure 2:** Analysis of H3K9me2 in telomeres.

559 **A:** IGV view of homologous telomere copies found in Sf9 cells (top) and L4 (down). From the  
560 top to bottom of each view, the following tracks are displayed: 1) log<sub>2</sub>(input/H3K9me2) bigwig  
561 file (bins = 50bp), 2) H3K9me2 peaks, 3) RNA-Seq track, 4) Annotated functional element  
562 (genes, repeated DNA)

563 **B:** H3K9me2 peak abundance in telomere annotated copies (top). Same result is shown with  
564 percentages (down).

565 **C:** Correlation between RNA-Seq expression (in cov, y-axis) and telomere length annotated  
566 copies (in kb, x-axis). Pearson correlation for Sf9 (left) and L4(right) are both indicated.

567 **D:** RNA-Seq expression boxplot comparison between telomeres, inactive genes and active  
568 genes are shown for Sf9 (left) and L4 (right). Statistical significance has been assessed by t-  
569 test. (\*): P<0,05 ;( \*\*): P< 0,001, NS: non-significant.

570

571 **Figure 3:** Analysis of H3K9me2 in repeated ribosomal locus.

572 **A:** IGV view of the rDNA copies found in Sf9 cells (top) and L4 (down). Tracks from top to  
573 bottom are: 1) log<sub>2</sub>(input/H3K9me2) bigwig file (bins = 50bp), 2) H3K9me2 peaks, 3) RNA-Seq  
574 track, 4) Annotated functional element (genes, repeated DNA)

575 **B:** RNA-Seq expression boxplot comparison between rDNA, inactive genes and active genes  
576 are shown for Sf9 (left) and L4 (right). Statistical significance has been assessed by t-test. (\*):  
577 P<0,05 ;( \*\*): P< 0,001, NS: non-significant.

578

579 **Figure 4:** Analysis of H3K9me2 around most abundant 150bp satDNA repeat.

580 **A:** Table showing first rank 150bp satDNA detected in Sf9 and L4 genome by RepeatExplorer.  
581 Probability, consensus length and DNA sequence composition are indicated.

582 **B:** Boxplot of 150bp satDNA repetition regions length in Sf9 (left) and L4 (right)

583 **C:** Boxplot of RNA-Seq expression (in cov, x-axis) between telomeres, 150bp candidate  
584 regions and inactive genes of Sf9 (left) and L4 (right). Statistical significance of expression has  
585 been assessed by t-test. (\*): P<0,05 ;( \*\*): P< 0,001, NS: non-significant.

586 **D:** H3K9me2 expression of peripheral major 150bp satDNA regions in Sf9 (left) and L4 (right).  
587 For upper graphs: Mean log<sub>2</sub>(H3K9me2/Input) signal (y-axis) in 10kb regions surrounding  
588 region of interest (x-axis).

589 For lower graphs: Decreasing  $\log_2(\text{H3K9me2}/\text{Input})$  expression (y-axis) of 150bp satDNA  
590 regions and 10kb around (x-axis)

591

592 **Figure 5:** Analysis of H3K9me2 enrichment with repeat element families.

593 **A:** Plots showing abundance (in %, x-axis) of H3K9me2 in annotated tandem repeats and  
594 transposable elements of Sf9 (left) and L4 (right) genomes

595 **B:** Boxplot comparing transposable elements RNA-Seq expression between those covered  
596 with H3K9me2, others without epigenetic mark association and pool of active genes

597

598 **Figure 6:** Analysis of gene regions covered with H3K9me2 mark.

599 **A:** Plots showing abundance (in %, y-axis) of H3K9me2 present in promoters, UTRs and CDS  
600 (x-axis) of active genes (upper part) vs. inactive genes (lower part) from Sf9 (left) and L4 (left)  
601 cell models.

602 **B:** Venn diagram showing unique genes respectively covered in Sf9 and L4 (left and right part)  
603 and common ones (middle part)

604

605 **Figure 7:** Analysis of H3K9me2 signal covering exons vs introns gene bodies. Left: Sf9; Right:  
606 L4.

607 For upper graphs: Mean  $\log_2(\text{H3K9me2}/\text{Input})$  signal (y-axis) in all exons (left) and introns  
608 (right, x-axis).

609 For lower graphs: Ascend  $\log_2(\text{H3K9me2}/\text{Input})$  expression (y-axis) in all exons (left) and  
610 introns (right, x-axis).

## 611 Supplementary Information

612

613 **Supplementary Fig. 1:** Immunofluorescence pictures showing H3K9me2 (red) distribution  
614 inside the nucleus at different stages of Sf9 cell cycle. Blue color is for DAPI staining and  
615 cells have been observed with a DIC microscope.

616

617 **Supplementary Fig. 2:** Western blot analysis with anti H3K9me2 antibodies of Sf9 cells (left)  
618 or L4 larvae (right) chromatin extracts. The 17KDa band corresponds to H3K9me2.  
619 Compared to Western-Blot performed with protein extracts on the same material showing  
620 one single band, extra bands here are most likely produced by cross-linking procedures.

621

622 **Supplementary Fig. 3:** Correlogram of bigwig files produced from each Input-seq and ChIP-  
623 seq samples in Sf9 and L4. Scores are Pearson correlation with 1 being most correlated and  
624 0 least.

625

626 **Supplementary Fig. 4:** D-genies plot comparison between H3K9me2 peaks sequences  
627 between Sf9 and L4

628 Upper part: D-genies graph comparison between Sf9 peaks against L4 peaks (left) and L4  
629 peaks against Sf9 ones (right). Best matches shown only.

630 Lower part: Summary of % sequences identity

631

632 **Supplementary Fig. 5:** Histogram of log<sub>2</sub>(tpm) count associated to genes annotated in each  
633 model reference genome. Left: Sf9; Right: L4. Sf9 cells show a typically bimodal distribution  
634 representing the sets of expressed and not expressed genes. L4 larvae contain a more  
635 heterogenous cell population and have a larger set of expressed genes. Tpm: transcripts per  
636 million base pairs.

637

638 **Supplementary Table 1:** Number of functional elements annotated in this study from both  
639 Sf9 cell line and L4 larvae reference genomes.

640

641 **Supplementary Table 2:** Sf9 cells and L4 larvae RNA-seq replicates and mapping statistics.  
642 Reads abundance and Bowtie2 alignment details are described for each sample.

643

644 **Supplementary Fig. 6:** Pie chart representing H3K9me2 peaks distribution with respect the  
645 annotated functional elements for each genome reference. If a large peak encompasses  
646 different features such as an intron or an exon, we counted both elements in the distribution.

647

648 **Supplementary Fig. 7:** Schematic representation of centromeric chromatin organization in  
649 monocentric model organisms.

650

651 **Supplementary Fig. 8:** H3K9me2 enrichment signal around shuffled regions produced from  
652 major 150bp satDNA domains in Sf9 (left) and L4 (right).

653 For upper graphs: Mean log<sub>2</sub>(H3K9me2/Input) signal (y-axis) in 10kb (left) and 1kb (right)  
654 regions surrounding region of interest (x-axis).

655 For lower graphs: Ascend log<sub>2</sub>(H3K9me2/Input) expression (y-axis) of 150bp satDNA regions  
656 and in 10kb (left) and 1kb (right) periphery (x-axis)

657

658 **Supplementary Fig. 9:** Gene ontology enrichment analysis of common H3K9me2  
659 associated genes between Sf9 and L4 models (Fisher exact test method). Only 15 most  
660 abundant category are shown (x-axis). Sequence abundance (in %, y-axis) of common vs. All  
661 annotated genes is represented.

662

663 **Supplementary Fig. 10:** Phylogenic tree of *Bombyx mori*, *Drosophila melanogaster* and  
664 *Spodoptera frugiperda* HP1 family proteins containing a chromodomain and a chromo  
665 shadow domain. The chromodomain protein Polycomb (PC) is represented as an outgroup.  
666 *D. melanogaster* HP1 proteins (HP1a is Suvar205; HP1b, HP1c, HP1e and Pc) were  
667 retrieved from Flybase (<https://flybase.org/>). *S. frugiperda* proteins from L4 genome  
668 annotations start with the 'GSSPFG' nomenclature and have been retrieved after blastp with

669 Drosophila HP1 proteins. *B. mori* proteins have been retrieved from ncbi  
670 (<https://www.ncbi.nlm.nih.gov/protein/>) after blastp with drosophila HP1 proteins.

671

672 **Supplementary Table 3:** Annotation and coordinates of putative telomeric regions in *S.*  
673 *frugiperda* genome based on [TTAGG]*n* repetitions.

674

675 **Supplementary Table 4:** Annotation and coordinates of presumptive rDNA locus in *S.*  
676 *frugiperda* genome.

677

## 678 References

- 679 d'Alençon, Emmanuelle d', Nicolas Nègre, Slavica Stanojčić, Benjamin Alassoeur, Sylvie  
680 Gimenez, Alexandre Léger, Adly Abd-Alla, Sylvie Juliant, et Philippe Fournier. 2011.  
681 « Characterization of a CENP-B Homolog in the Holocentric Lepidoptera Spodoptera  
682 *Frugiperda* ». *Gene* 485 (2): 91-101. <https://doi.org/10.1016/j.gene.2011.06.007>.
- 683 Allshire, Robin C., et Hiten D. Madhani. 2018. « Ten Principles of Heterochromatin Formation  
684 and Function ». *Nature Reviews. Molecular Cell Biology* 19 (4): 229-44.  
685 <https://doi.org/10.1038/nrm.2017.119>.
- 686 Benson, G. 1999. « Tandem Repeats Finder: A Program to Analyze DNA Sequences ». *Nucleic Acids Research* 27 (2): 573-80. <https://doi.org/10.1093/nar/27.2.573>.
- 687 Bierhoff, Holger, Anna Postepska-Igielska, et Ingrid Grummt. 2014. « Noisy Silence: Non-  
688 Coding RNA and Heterochromatin Formation at Repetitive Elements ». *Epigenetics* 9  
689 (1): 53-61. <https://doi.org/10.4161/epi.26485>.
- 691 Bonasio, Roberto, Qiye Li, Jinmin Lian, Navdeep S. Mutti, Lijun Jin, Hongmei Zhao, Pei  
692 Zhang, et al. 2012. « Genome-Wide and Caste-Specific DNA Methylomes of the Ants  
693 *Camponotus Floridanus* and *Harpegnathos Saltator* ». *Current Biology: CB* 22 (19):  
694 1755-64. <https://doi.org/10.1016/j.cub.2012.07.042>.
- 695 Borsatti, Federica, et Mauro Mandrioli. 2013. « Conservation of HP1 and Methylated H3  
696 Histones as Heterochromatic Epigenetic Markers in the Holocentric Chromosomes of  
697 the Cabbage Moth, *Mamestra Brassicae* (Lepidoptera) ». *EJE*
- 698 Cabanettes, Floréal, et Christophe Klopp. 2018. « D-GENIES: Dot Plot Large Genomes in an  
699 Interactive, Efficient and Simple Way ». *PeerJ* 6 (juin): e4958.  
700 <https://doi.org/10.7717/peerj.4958>.
- 701 Collins, Cairtriona M., Beatrice Malacrida, Colin Burke, Patrick A. Kiely, et Elaine M.  
702 Dunleavy. 2018. « ATP Synthase F1 Subunits Recruited to Centromeres by CENP-A  
703 Are Required for Male Meiosis ». *Nature Communications* 9 (1): 2702.  
704 <https://doi.org/10.1038/s41467-018-05093-9>.
- 705 Conesa, Ana, Stefan Götz, Juan Miguel García-Gómez, Javier Terol, Manuel Talón, et  
706 Montserrat Robles. 2005. « Blast2GO: a universal tool for annotation, visualization  
707 and analysis in functional genomics research ». *Bioinformatics* 21 (18): 3674-76.  
708 <https://doi.org/10.1093/bioinformatics/bti610>.
- 709 Cortes-Silva, Nuria, Jonathan Ulmer, Takashi Kiuchi, Emily Hsieh, Gaetan Cornilleau, Ilham  
710 Laidid, Florent Dingli, Damarys Loew, Susumu Katsuma, et Ines A. Drinnenberg.  
711 2020. « CenH3-Independent Kinetochores Assembly in Lepidoptera Requires CCAN,  
712 Including CENP-T ». *Current Biology: CB* 30 (4): 561-572.e10.



- 713 <https://doi.org/10.1016/j.cub.2019.12.014>.
- 714 Crespi, Bernard, et Patrik Nosil. 2013. « Conflictual Speciation: Species Formation via  
715 Genomic Conflict ». *Trends in Ecology & Evolution* 28 (1): 48-57.  
716 <https://doi.org/10.1016/j.tree.2012.08.015>.
- 717 Dillon, Niall. 2004. « Heterochromatin Structure and Function ». *Biology of the Cell* 96 (8):  
718 631-37. <https://doi.org/10.1016/j.biolcel.2004.06.003>.
- 719 Dimitri, Patrizio, Ruggiero Caizzi, Ennio Giordano, Maria Carmela Accardo, Giovanna  
720 Lattanzi, et Giuseppe Biamonti. 2009. « Constitutive Heterochromatin: A Surprising  
721 Variety of Expressed Sequences ». *Chromosoma* 118 (4): 419-35.  
722 <https://doi.org/10.1007/s00412-009-0211-y>.
- 723 Drinnenberg, Ines A, Dakota deYoung, Steven Henikoff, et Harmit Singh Malik. 2014.  
724 « Recurrent loss of CenH3 is associated with independent transitions to holocentricity  
725 in insects ». Édité par Anthony A Hyman. *eLife* 3 (septembre): e03676.  
726 <https://doi.org/10.7554/eLife.03676>.
- 727 Duan, Qing, Haobin Chen, Max Costa, et Wei Dai. 2008. « Phosphorylation of H3S10 Blocks  
728 the Access of H3K9 by Specific Antibodies and Histone Methyltransferase ». *The  
729 Journal of Biological Chemistry* 283 (48): 33585-90.  
730 <https://doi.org/10.1074/jbc.M803312200>.
- 731 Escudero, Marcial, J. Ignacio Márquez-Corro, et Andrew L. Hipp. 2016. « The Phylogenetic  
732 Origins and Evolutionary History of Holocentric Chromosomes ». *Systematic Botany*  
733 41 (3): 580-85. <https://doi.org/10.1600/036364416X692442>.
- 734 Ferree, Patrick M., et Daniel A. Barbash. 2009. « Species-Specific Heterochromatin Prevents  
735 Mitotic Chromosome Segregation to Cause Hybrid Lethality in *Drosophila* ». *PLOS  
736 Biology* 7 (10): e1000234. <https://doi.org/10.1371/journal.pbio.1000234>.
- 737 Gassmann, Reto, Andreas Rechtsteiner, Karen W. Yuen, Andrew Muroyama, Thea  
738 Egelhofer, Laura Gaydos, Francie Barron, et al. 2012. « An Inverse Relationship to  
739 Germline Transcription Defines Centromeric Chromatin in *C. Elegans* ». *Nature* 484  
740 (7395): 534-37. <https://doi.org/10.1038/nature10973>.
- 741 Gibert, Jean-Michel, Emmanuèle Mouchel-Vielh, Sandra De Castro, et Frédérique Peronnet.  
742 2016. « Phenotypic Plasticity through Transcriptional Regulation of the Evolutionary  
743 Hotspot Gene Tan in *Drosophila Melanogaster* ». *PLoS Genetics* 12 (8): e1006218.  
744 <https://doi.org/10.1371/journal.pgen.1006218>.
- 745 Goergen, Georg, P. Lava Kumar, Sagnia B. Sankung, Abou Togola, et Manuele Tamò. 2016.  
746 « First Report of Outbreaks of the Fall Armyworm *Spodoptera Frugiperda* (J E Smith)  
747 (Lepidoptera, Noctuidae), a New Alien Invasive Pest in West and Central Africa ».  *748 PLOS ONE* 11 (10): e0165632. <https://doi.org/10.1371/journal.pone.0165632>.
- 749 Gong, H., W. Zhu, J. Zhang, X. Li, Q. Meng, G. Zhou, M. Wang, et al. 2015. « TTAGG-  
750 Repeat Telomeres and Characterization of Telomerase in the Beet Armyworm,  
751 *Spodoptera Exigua* (Lepidoptera: Noctuidae) ». *Insect Molecular Biology* 24 (3):  
752 358-67. <https://doi.org/10.1111/imb.12163>.
- 753 Gouin, Anaïs, Anthony Bretaudeau, Kiwoong Nam, Sylvie Gimenez, Jean-Marc Aury,  
754 Bernard Duvic, Frédérique Hilliou, et al. 2017. « Two Genomes of Highly  
755 Polyphagous Lepidopteran Pests ( *Spodoptera Frugiperda* , Noctuidae) with Different  
756 Host-Plant Ranges ». *Scientific Reports* 7 (1): 11816. [https://doi.org/10.1038/s41598-  
757 017-10461-4](https://doi.org/10.1038/s41598-017-10461-4).
- 758 Grewal, Shiv I. S., et Songtao Jia. 2007. « Heterochromatin Revisited ». *Nature Reviews  
759 Genetics* 8 (1): 35-46. <https://doi.org/10.1038/nrg2008>.
- 760 Heitz E. Das Heterochromatin der Moose. *Jahrb Wiss Botanik*. 1928;69:762–818.
- 761 Henikoff, Steven, Kami Ahmad, et Harmit S. Malik. 2001. « The Centromere Paradox: Stable



- 762 Inheritance with Rapidly Evolving DNA ». *Science* 293 (5532): 1098-1102.  
763 <https://doi.org/10.1126/science.1062939>.
- 764 Ho, Joshua W. K., Youngsook L. Jung, Tao Liu, Burak H. Alver, Soohyun Lee, Kohta  
765 Ikegami, Kyung-Ah Sohn, et al. 2014. « Comparative Analysis of Metazoan Chromatin  
766 Organization ». *Nature* 512 (7515): 449-52. <https://doi.org/10.1038/nature13415>.
- 767 Hughes, Stacie E., et R. Scott Hawley. 2009. « Heterochromatin: A Rapidly Evolving Species  
768 Barrier ». *PLoS Biology* 7 (10). <https://doi.org/10.1371/journal.pbio.1000233>.
- 769 Janssen, Aniek, Serafin U. Colmenares, et Gary H. Karpen. 2018. « Heterochromatin:  
770 Guardian of the Genome ». *Annual Review of Cell and Developmental Biology* 34  
771 (octobre): 265-88. <https://doi.org/10.1146/annurev-cellbio-100617-062653>.
- 772 Jarman-Smith, R. F., S. J. Armstrong, C. J. Mannix, et M. Al-Rubeai. 2002. « Chromosome  
773 Instability in Spodoptera Frugiperda Sf-9 Cell Line ». *Biotechnology Progress* 18 (3):  
774 623-28. <https://doi.org/10.1021/bp020028>.
- 775 Jeong, Young Sun, Sunwha Cho, Jung Sun Park, Yong Ko, et Yong-Kook Kang. 2010.  
776 « Phosphorylation of Serine-10 of Histone H3 Shields Modified Lysine-9 Selectively  
777 during Mitosis ». *Genes to Cells: Devoted to Molecular & Cellular Mechanisms* 15 (3):  
778 181-92. <https://doi.org/10.1111/j.1365-2443.2009.01375.x>.
- 779 Johnson, Norman A. 2010. « Hybrid Incompatibility Genes: Remnants of a Genomic  
780 Battlefield? » *Trends in Genetics* 26 (7): 317-25.  
781 <https://doi.org/10.1016/j.tig.2010.04.005>.
- 782 Kakumani, Pavan Kumar, Pawan Malhotra, Sunil K. Mukherjee, et Raj K. Bhatnagar. 2014.  
783 « A Draft Genome Assembly of the Army Worm, Spodoptera Frugiperda ». *Genomics*  
784 104 (2): 134-43. <https://doi.org/10.1016/j.ygeno.2014.06.005>.
- 785 Keller, Oliver, Florian Odrionitz, Mario Stanke, Martin Kollmar, et Stephan Waack. 2008.  
786 « Scipio: Using Protein Sequences to Determine the Precise Exon/Intron Structures of  
787 Genes and Their Orthologs in Closely Related Species ». *BMC Bioinformatics* 9 (juin):  
788 278. <https://doi.org/10.1186/1471-2105-9-278>.
- 789 Kharchenko, Peter V., Artyom A. Alekseyenko, Yuri B. Schwartz, Aki Minoda, Nicole C.  
790 Riddle, Jason Ernst, Peter J. Sabo, et al. 2011. « Comprehensive Analysis of the  
791 Chromatin Landscape in Drosophila Melanogaster ». *Nature* 471 (7339): 480-85.  
792 <https://doi.org/10.1038/nature09725>.
- 793 Klenov, Mikhail S., Sergey A. Lavrov, Anastasia D. Stolyarenko, Sergey S. Ryazansky,  
794 Alexei A. Aravin, Thomas Tuschl, et Vladimir A. Gvozdev. 2007. « Repeat-associated  
795 siRNAs cause chromatin silencing of retrotransposons in the Drosophila  
796 melanogaster germline ». *Nucleic Acids Research* 35 (16): 5430-38.  
797 <https://doi.org/10.1093/nar/gkm576>.
- 798 Kondo, Yutaka, Lanlan Shen, Saira Ahmed, Yanis Bumber, Yoshitaka Sekido, Bassem R.  
799 Haddad, et Jean-Pierre J. Issa. 2008. « Downregulation of Histone H3 Lysine 9  
800 Methyltransferase G9a Induces Centrosome Disruption and Chromosome Instability  
801 in Cancer Cells ». *PLOS ONE* 3 (4): e2037.  
802 <https://doi.org/10.1371/journal.pone.0002037>.
- 803 Lachner, Monika, Dónal O'Carroll, Stephen Rea, Karl Mechtler, et Thomas Jenuwein. 2001.  
804 « Methylation of Histone H3 Lysine 9 Creates a Binding Site for HP1 Proteins ». *Nature*  
805 410 (6824): 116-20. <https://doi.org/10.1038/35065132>.
- 806 Langmead, Ben, Cole Trapnell, Mihai Pop, et Steven L. Salzberg. 2009. « Ultrafast and  
807 Memory-Efficient Alignment of Short DNA Sequences to the Human Genome ». *Genome Biology*  
808 10 (3): R25. <https://doi.org/10.1186/gb-2009-10-3-r25>.
- 809 Le Thomas, Adrien, Alicia K. Rogers, Alexandre Webster, Georgi K. Marinov, Susan E. Liao,  
810 Edward M. Perkins, Junho K. Hur, Alexei A. Aravin, et Katalin Fejes Tóth. 2013.

- 811 « Piwi Induces PiRNA-Guided Transcriptional Silencing and Establishment of a  
812 Repressive Chromatin State ». *Genes & Development* 27 (4): 390-99.  
813 <https://doi.org/10.1101/gad.209841.112>.
- 814 Lee, Yuh Chwen G., Yuki Ogiyama, Nuno M. C. Martins, Brian J. Beliveau, David Acevedo,  
815 C.-ting Wu, Giacomo Cavalli, et Gary H. Karpen. 2020. « Pericentromeric  
816 Heterochromatin Is Hierarchically Organized and Spatially Contacts H3K9me2 Islands  
817 in Euchromatin ». *PLOS Genetics* 16 (3): e1008673.  
818 <https://doi.org/10.1371/journal.pgen.1008673>.
- 819 Legeai, Fabrice, Sylvie Gimenez, Bernard Duvic, Jean-Michel Escoubas, Anne-Sophie  
820 Gosselin Grenet, Florence Blanc, François Cousserans, et al. 2014. « Establishment  
821 and Analysis of a Reference Transcriptome for *Spodoptera Frugiperda* ». *BMC*  
822 *Genomics* 15 (août): 704. <https://doi.org/10.1186/1471-2164-15-704>.
- 823 Li, Heng, Bob Handsaker, Alec Wysoker, Tim Fennell, Jue Ruan, Nils Homer, Gabor Marth,  
824 Goncalo Abecasis, Richard Durbin, et 1000 Genome Project Data Processing  
825 Subgroup. 2009. « The Sequence Alignment/Map format and SAMtools ». *Bioinformatics*  
826 25 (16): 2078-79. <https://doi.org/10.1093/bioinformatics/btp352>.
- 827 Li-Byarlay, Hongmei, Yang Li, Hume Stroud, Suhua Feng, Thomas C. Newman, Megan  
828 Kaneda, Kirk K. Hou, et al. 2013. « RNA Interference Knockdown of DNA Methyl-  
829 Transferase 3 Affects Gene Alternative Splicing in the Honey Bee ». *Proceedings of*  
830 *the National Academy of Sciences* 110 (31): 12750-55.  
831 <https://doi.org/10.1073/pnas.1310735110>.
- 832 Liu, Tao, Andreas Rechtsteiner, Thea A. Egelhofer, Anne Vielle, Isabel Latorre, Ming-Sin  
833 Cheung, Sevinc Ercan, et al. 2011. « Broad Chromosomal Domains of Histone  
834 Modification Patterns in *C. Elegans* ». *Genome Research* 21 (2): 227-36.  
835 <https://doi.org/10.1101/gr.115519.110>.
- 836 Lomberk, Gwen, Lori Wallrath, et Raul Urrutia. 2006. « The Heterochromatin Protein 1  
837 Family ». *Genome Biology* 7 (7): 228. <https://doi.org/10.1186/gb-2006-7-7-228>.
- 838 Luger, K., A. W. Mäder, R. K. Richmond, D. F. Sargent, et T. J. Richmond. 1997. « Crystal  
839 Structure of the Nucleosome Core Particle at 2.8 Å Resolution ». *Nature* 389 (6648):  
840 251-60. <https://doi.org/10.1038/38444>.
- 841 Madani Tonekaboni, Seyed Ali, Benjamin Haibe-Kains, et Mathieu Lupien. 2021. « Large  
842 Organized Chromatin Lysine Domains Help Distinguish Primitive from Differentiated  
843 Cell Populations ». *Nature Communications* 12 (1): 499.  
844 <https://doi.org/10.1038/s41467-020-20830-9>.
- 845 Maison, Christèle, et Geneviève Almouzni. 2004. « HP1 and the Dynamics of  
846 Heterochromatin Maintenance ». *Nature Reviews. Molecular Cell Biology* 5 (4):  
847 296-304. <https://doi.org/10.1038/nrm1355>.
- 848 Marques, André, Tiago Ribeiro, Pavel Neumann, Jiří Macas, Petr Novák, Veit Schubert,  
849 Marco Pellino, et al. 2015. « Holocentromeres in *Rhynchospora* Are Associated with  
850 Genome-Wide Centromere-Specific Repeat Arrays Interspersed among  
851 Euchromatin ». *Proceedings of the National Academy of Sciences* 112 (44):  
852 13633-38. <https://doi.org/10.1073/pnas.1512255112>.
- 853 Melters, Daniël P., Keith R. Bradnam, Hugh A. Young, Natalie Telis, Michael R. May, J.  
854 Graham Ruby, Robert Sebra, et al. 2013. « Comparative analysis of tandem repeats  
855 from hundreds of species reveals unique insights into centromere evolution ». *Genome Biology*  
856 14 (1): R10. <https://doi.org/10.1186/gb-2013-14-1-r10>.
- 857 Melters, Daniël P., Leocadia V. Paliulis, Ian F. Korf, et Simon W. L. Chan. 2012.  
858 « Holocentric Chromosomes: Convergent Evolution, Meiotic Adaptations, and  
859 Genomic Analysis ». *Chromosome Research: An International Journal on the*

- 860 *Molecular, Supramolecular and Evolutionary Aspects of Chromosome Biology* 20 (5):  
861 579-93. <https://doi.org/10.1007/s10577-012-9292-1>.
- 862 Minc, E., Y. Allory, H. J. Worman, J. C. Courvalin, et B. Buendia. 1999. « Localization and  
863 Phosphorylation of HP1 Proteins during the Cell Cycle in Mammalian Cells ». *Chromosoma* 108 (4): 220-34. <https://doi.org/10.1007/s004120050372>.
- 864 Mitsunobu, H., M. Izumi, H. Mon, T. Tatsuke, J. M. Lee, et T. Kusakabe. 2012. « Molecular  
865 Characterization of Heterochromatin Proteins 1a and 1b from the Silkworm, Bombyx  
866 Mori ». *Insect Molecular Biology* 21 (1): 9-20. <https://doi.org/10.1111/j.1365-2583.2011.01115.x>.
- 869 Moné, Yves, Sandra Nhim, Sylvie Gimenez, Fabrice Legeai, Imène Seninet, Hugues  
870 Parrinello, Nicolas Nègre, et Emmanuelle d'Alençon. 2018. « Characterization and  
871 expression profiling of microRNAs in response to plant feeding in two host-plant  
872 strains of the lepidopteran pest *Spodoptera frugiperda* ». *BMC Genomics* 19 (1): 804.  
873 <https://doi.org/10.1186/s12864-018-5119-6>.
- 874 Nam, Kiwoong, Sandra Nhim, Stéphanie Robin, Anthony Bretaudeau, Nicolas Nègre, et  
875 Emmanuelle d'Alençon. 2020. « Positive Selection Alone Is Sufficient for Whole  
876 Genome Differentiation at the Early Stage of Speciation Process in the Fall  
877 Armyworm ». *BMC Evolutionary Biology* 20 (1): 152. <https://doi.org/10.1186/s12862-020-01715-3>.
- 879 Nandakumar, Subhiksha, Hailun Ma, et Arifa S. Khan. 2017. « Whole-Genome Sequence of  
880 the *Spodoptera frugiperda* Sf9 Insect Cell Line ». *Genome Announcements* 5 (34).  
881 <https://doi.org/10.1128/genomeA.00829-17>.
- 882 Nègre, Nicolas, Sergey Lavrov, Jérôme Hennetin, Michel Bellis, et Giacomo Cavalli. 2006.  
883 « Mapping the Distribution of Chromatin Proteins by ChIP on Chip ». In *Methods in*  
884 *Enzymology*, 410:316-41. DNA Microarrays, Part A: Array Platforms and Wet-Bench  
885 Protocols. Academic Press. [https://doi.org/10.1016/S0076-6879\(06\)10015-4](https://doi.org/10.1016/S0076-6879(06)10015-4).
- 886 Nguyen, Petr, Ken Sahara, Atsuo Yoshido, et Frantisek Marec. 2010. « Evolutionary  
887 Dynamics of rDNA Clusters on Chromosomes of Moths and Butterflies  
888 (Lepidoptera) ». *Genetica* 138 (3): 343-54. <https://doi.org/10.1007/s10709-009-9424-5>.
- 889 5.
- 890 Novák, Petr, Pavel Neumann, Jiří Pech, Jaroslav Steinhaisl, et Jiří Macas. 2013.  
891 « RepeatExplorer: A Galaxy-Based Web Server for Genome-Wide Characterization of  
892 Eukaryotic Repetitive Elements from next-Generation Sequence Reads ». *Bioinformatics (Oxford, England)* 29 (6): 792-93.  
893 <https://doi.org/10.1093/bioinformatics/btt054>.
- 894 Oliveira, Ludmila, Pavel Neumann, Tae-Soo Jang, Sonja Klemme, Veit Schubert, Andrea  
895 Koblížková, Andreas Houben, et Jiří Macas. 2020. « Mitotic Spindle Attachment to the  
896 Holocentric Chromosomes of *Cuscuta Europaea* Does Not Correlate With the  
897 Distribution of CENH3 Chromatin ». *Frontiers in Plant Science* 10.  
898 <https://doi.org/10.3389/fpls.2019.01799>.
- 899 Orsucci, Marion, Yves Moné, Philippe Audiot, Sylvie Gimenez, Sandra Nhim, Rima Naït-  
900 Saïdi, Marie Frayssinet, et al. 2020. « Transcriptional Differences between the Two  
901 Host Strains of *Spodoptera frugiperda* (Lepidoptera: Noctuidae) ». *BioRxiv*, juin,  
902 263186. <https://doi.org/10.1101/263186>.
- 903 Perte, Mihaela, Geo M. Perte, Corina M. Antonescu, Tsung-Cheng Chang, Joshua T.  
904 Mendell, et Steven L. Salzberg. 2015. « StringTie Enables Improved Reconstruction  
905 of a Transcriptome from RNA-Seq Reads ». *Nature Biotechnology* 33 (3): 290-95.  
906 <https://doi.org/10.1038/nbt.3122>.
- 907 Poleshko, Andrey, Cheryl L Smith, Son C Nguyen, Priya Sivaramakrishnan, Karen G Wong,  
908

- 909 John Isaac Murray, Melike Lakadamyali, Eric F Joyce, Rajan Jain, et Jonathan A  
910 Epstein. 2019. « H3K9me2 orchestrates inheritance of spatial positioning of  
911 peripheral heterochromatin through mitosis ». Édité par Andrés Aguilera, Jessica K  
912 Tyler, et Andrew S Belmont. *eLife* 8 (octobre): e49278.  
913 <https://doi.org/10.7554/eLife.49278>.
- 914 Rachez, Christophe, Rachel Legendre, Mickaël Costallat, Hugo Varet, Jia Yi, Etienne  
915 Kornobis, Caroline Proux, et Christian Muchardt. 2019. « An Impact of HP1 $\gamma$  on the  
916 Fidelity of Pre-mRNA Splicing Arises from Its Ability to Bind RNA via Intronic  
917 Repeated Sequences ». *BioRxiv*, juin, 686790. <https://doi.org/10.1101/686790>.
- 918 Ramírez, Fidel, Devon P. Ryan, Björn Grüning, Vivek Bhardwaj, Fabian Kilpert, Andreas S.  
919 Richter, Steffen Heyne, Friederike Dündar, et Thomas Manke. 2016. « DeepTools2: A  
920 next Generation Web Server for Deep-Sequencing Data Analysis ». *Nucleic Acids  
921 Research* 44 (W1): W160-165. <https://doi.org/10.1093/nar/gkw257>.
- 922 Rea, S., F. Eisenhaber, D. O'Carroll, B. D. Strahl, Z. W. Sun, M. Schmid, S. Opravil, et al.  
923 2000. « Regulation of Chromatin Structure by Site-Specific Histone H3  
924 Methyltransferases ». *Nature* 406 (6796): 593-99. <https://doi.org/10.1038/35020506>.
- 925 Riddle, Nicole C., Aki Minoda, Peter V. Kharchenko, Artyom A. Alekseyenko, Yuri B.  
926 Schwartz, Michael Y. Tolstorukov, Andrey A. Gorchakov, et al. 2011. « Plasticity in  
927 Patterns of Histone Modifications and Chromosomal Proteins in *Drosophila*  
928 Heterochromatin ». *Genome Research* 21 (2): 147-63.  
929 <https://doi.org/10.1101/gr.110098.110>.
- 930 Robinson. 1971. « Lepidoptera Genetics ». 1971.  
931 <https://www.elsevier.com/books/lepidoptera-genetics/robinson/978-0-08-006659-2>.
- 932 Saha, Parna, Divya Tej Sowpati, Mamilla Soujanya, Ishanee Srivastava, et Rakesh Kumar  
933 Mishra. 2020. « Interplay of pericentromeric genome organization and chromatin  
934 landscape regulates the expression of *Drosophila melanogaster* heterochromatic  
935 genes ». *Epigenetics & Chromatin* 13 (1): 41. <https://doi.org/10.1186/s13072-020-00358-4>.
- 937 Saint-André, Violaine, Eric Batsché, Christophe Rachez, et Christian Muchardt. 2011.  
938 « Histone H3 Lysine 9 Trimethylation and HP1 $\gamma$  Favor Inclusion of Alternative  
939 Exons ». *Nature Structural & Molecular Biology* 18 (3): 337-44.  
940 <https://doi.org/10.1038/nsmb.1995>.
- 941 Satyaki, P. R. V., Tawny N. Cuykendall, Kevin H.-C. Wei, Nicholas J. Brideau, Hojoong  
942 Kwak, S. Aruna, Patrick M. Ferree, Shuqing Ji, et Daniel A. Barbash. 2014. « The  
943 Hmr and Lhr Hybrid Incompatibility Genes Suppress a Broad Range of  
944 Heterochromatic Repeats ». *PLOS Genetics* 10 (3): e1004240.  
945 <https://doi.org/10.1371/journal.pgen.1004240>.
- 946 Schoeftner, Stefan, et Maria A. Blasco. 2010. « Chromatin Regulation and Non-Coding RNAs  
947 at Mammalian Telomeres ». *Seminars in Cell & Developmental Biology* 21 (2):  
948 186-93. <https://doi.org/10.1016/j.semcdb.2009.09.015>.
- 949 Schrader, Franz. 1935. « Notes on the Mitotic Behavior of Long Chromosomes ». *Cytologia* 6  
950 (4): 422-30. <https://doi.org/10.1508/cytologia.6.422>.
- 951 Senaratne, Aruni P., Héloïse Muller, Kelsey A. Fryer, Munetaka Kawamoto, Susumu  
952 Katsuma, et Ines A. Drinnenberg. 2021. « Formation of the CenH3-Deficient  
953 Holocentromere in *Lepidoptera* Avoids Active Chromatin ». *Current Biology: CB* 31  
954 (1): 173-181.e7. <https://doi.org/10.1016/j.cub.2020.09.078>.
- 955 Shaw, Peter J., et Peter C. McKeown. 2011. « The Structure of rDNA Chromatin ». In *The  
956 Nucleolus*, édité par Mark O. J. Olson, 43-55. Protein Reviews. New York, NY:



- 957 Springer. [https://doi.org/10.1007/978-1-4614-0514-6\\_3](https://doi.org/10.1007/978-1-4614-0514-6_3).
- 958 Sienski, Grzegorz, Derya Dönertas, et Julius Brennecke. 2012. « Transcriptional Silencing of  
959 Transposons by Piwi and Maelstrom and Its Impact on Chromatin State and Gene  
960 Expression ». *Cell* 151 (5): 964-80. <https://doi.org/10.1016/j.cell.2012.10.040>.
- 961 Simola, Daniel F., Riley J. Graham, Cristina M. Brady, Brittany L. Enzmann, Claude Desplan,  
962 Anandasankar Ray, Laurence J. Zwiebel, et al. 2016. « Epigenetic (Re)Programming  
963 of Caste-Specific Behavior in the Ant *Camponotus Floridanus* ». *Science (New York,  
964 N.Y.)* 351 (6268): aac6633. <https://doi.org/10.1126/science.aac6633>.
- 965 Srivastava, Rakesh, Rashmi Srivastava, et Seong Hoon Ahn. 2016. « The Epigenetic  
966 Pathways to Ribosomal DNA Silencing ». *Microbiology and Molecular Biology  
967 Reviews: MMBR* 80 (3): 545-63. <https://doi.org/10.1128/MMBR.00005-16>.
- 968 Stanojcic, Slavica, Sylvie Gimenez, Emmanuelle Permal, François Cousserans, Hadi  
969 Quesneville, Philippe Fournier, et Emmanuelle d'Alençon. 2011. « Correlation of  
970 LNCr RasiRNAs Expression with Heterochromatin Formation during Development of  
971 the Holocentric Insect *Spodoptera Frugiperda* ». *PLOS ONE* 6 (9): e24746.  
972 <https://doi.org/10.1371/journal.pone.0024746>.
- 973 Steiner, Florian A, et Steven Henikoff. 2014. « Holocentromeres are dispersed point  
974 centromeres localized at transcription factor hotspots ». Édité par Asifa Akhtar. *eLife* 3  
975 (avril): e02025. <https://doi.org/10.7554/eLife.02025>.
- 976 Subirana, Juan A., et Xavier Messeguer. 2013. « A Satellite Explosion in the Genome of  
977 Holocentric Nematodes ». *PLoS One* 8 (4): e62221.  
978 <https://doi.org/10.1371/journal.pone.0062221>.
- 979 Sullivan, Beth A., et Gary H. Karpen. 2004. « Centromeric Chromatin Exhibits a Histone  
980 Modification Pattern That Is Distinct from Both Euchromatin and Heterochromatin ». *Nature Structural & Molecular Biology* 11 (11): 1076-83.  
981 <https://doi.org/10.1038/nsmb845>.
- 982
- 983 Tachibana, M., K. Sugimoto, T. Fukushima, et Y. Shinkai. 2001. « Set Domain-Containing  
984 Protein, G9a, Is a Novel Lysine-Preferring Mammalian Histone Methyltransferase with  
985 Hyperactivity and Specific Selectivity to Lysines 9 and 27 of Histone H3 ». *The  
986 Journal of Biological Chemistry* 276 (27): 25309-17.  
987 <https://doi.org/10.1074/jbc.M101914200>.
- 988 Tachibana, Makoto, Kenji Sugimoto, Masami Nozaki, Jun Ueda, Tsutomu Ohta, Misao Ohki,  
989 Mikiko Fukuda, et al. 2002. « G9a Histone Methyltransferase Plays a Dominant Role  
990 in Euchromatic Histone H3 Lysine 9 Methylation and Is Essential for Early  
991 Embryogenesis ». *Genes & Development* 16 (14): 1779-91.  
992 <https://doi.org/10.1101/gad.989402>.
- 993 Tagu, Denis, John K. Colbourne, et Nicolas Nègre. 2014. « Genomic data integration for  
994 ecological and evolutionary traits in non-model organisms ». *BMC Genomics* 15 (1):  
995 490. <https://doi.org/10.1186/1471-2164-15-490>.
- 996 Thorvaldsdóttir, Helga, James T. Robinson, et Jill P. Mesirov. 2013. « Integrative Genomics  
997 Viewer (IGV): High-Performance Genomics Data Visualization and Exploration ». *Briefings in Bioinformatics* 14 (2): 178-92. <https://doi.org/10.1093/bib/bbs017>.
- 998
- 999 Vaughn, J. L., R. H. Goodwin, G. J. Tompkins, et P. McCawley. 1977. « The Establishment of  
1000 Two Cell Lines from the Insect *Spodoptera Frugiperda* (Lepidoptera; Noctuidae) ». *In  
1001 Vitro* 13 (4): 213-17. <https://doi.org/10.1007/BF02615077>.
- 1002 Verschure, Pernelle J., Ineke van der Kraan, Wim de Leeuw, Johan van der Vlag, Anne E.  
1003 Carpenter, Andrew S. Belmont, et Roel van Driel. 2005. « In Vivo HP1 Targeting  
1004 Causes Large-Scale Chromatin Condensation and Enhanced Histone Lysine

- 1005 Methylation ». *Molecular and Cellular Biology* 25 (11): 4552-64.  
1006 <https://doi.org/10.1128/MCB.25.11.4552-4564.2005>.
- 1007 Vershinina, Alisa O., Boris A. Anokhin, et Vladimir A. Lukhtanov. 2015. « Ribosomal DNA  
1008 clusters and telomeric (TTAGG)<sub>n</sub> repeats in blue butterflies (Lepidoptera, Lycaenidae)  
1009 with low and high chromosome numbers ». *Comparative Cytogenetics* 9 (2): 161-71.  
1010 <https://doi.org/10.3897/CompCytogen.v9i2.4715>.
- 1011 Wallrath, L. L., et S. C. Elgin. 1995. « Position Effect Variegation in Drosophila Is Associated  
1012 with an Altered Chromatin Structure. » *Genes & Development* 9 (10): 1263-77.  
1013 <https://doi.org/10.1101/gad.9.10.1263>.
- 1014 Wen, Bo, Hao Wu, Yoichi Shinkai, Rafael A. Irizarry, et Andrew P. Feinberg. 2009. « Large  
1015 organized chromatin K9-modifications (LOCKs) distinguish differentiated from  
1016 embryonic stem cells ». *Nature genetics* 41 (2): 246-50.  
1017 <https://doi.org/10.1038/ng.297>.
- 1018 Wolf, Klaus Werner. 1996. « The Structure of Condensed Chromosomes in Mitosis and  
1019 Meiosis of Insects ». *International Journal of Insect Morphology and Embryology* 25  
1020 (1): 37-62. [https://doi.org/10.1016/0020-7322\(95\)00021-6](https://doi.org/10.1016/0020-7322(95)00021-6).
- 1021 Yasuhara, Jiro C., et Barbara T. Wakimoto. 2008. « Molecular Landscape of Modified  
1022 Histones in Drosophila Heterochromatic Genes and Euchromatin-Heterochromatin  
1023 Transition Zones ». *PLOS Genetics* 4 (1): e16.  
1024 <https://doi.org/10.1371/journal.pgen.0040016>.
- 1025 Zedek, František, et Petr Bureš. 2016. « Absence of Positive Selection on CenH3 in Luzula  
1026 Suggests That Holokinetic Chromosomes May Suppress Centromere Drive ». *Annals  
1027 of Botany* 118 (7): 1347-52. <https://doi.org/10.1093/aob/mcw186>.
- 1028 Zhang, Lei, Bo Liu, Weigang Zheng, Conghui Liu, Dandan Zhang, Shengyuan Zhao, Zaiyuan  
1029 Li, et al. 2020. « Genetic Structure and Insecticide Resistance Characteristics of Fall  
1030 Armyworm Populations Invading China ». *Molecular Ecology Resources* 20 (6):  
1031 1682-96. <https://doi.org/10.1111/1755-0998.13219>.
- 1032 Zhang, Yong, Tao Liu, Clifford A. Meyer, Jérôme Eeckhoute, David S. Johnson, Bradley E.  
1033 Bernstein, Chad Nusbaum, et al. 2008. « Model-based Analysis of ChIP-Seq  
1034 (MACS) ». *Genome Biology* 9 (9): R137. <https://doi.org/10.1186/gb-2008-9-9-r137>.  
1035



# Figure 1

bioRxiv preprint doi: <https://doi.org/10.1101/2021.07.07.451438>; this version posted July 8, 2021. The copyright holder for this preprint (which was not certified by peer review) is the author/funder, who has granted bioRxiv a license to display the preprint in perpetuity. It is made available under a [CC-BY-NC-ND 4.0 International license](#).

## A MACS2 H3K9me2 Sf9 peak detection (n= 35596)

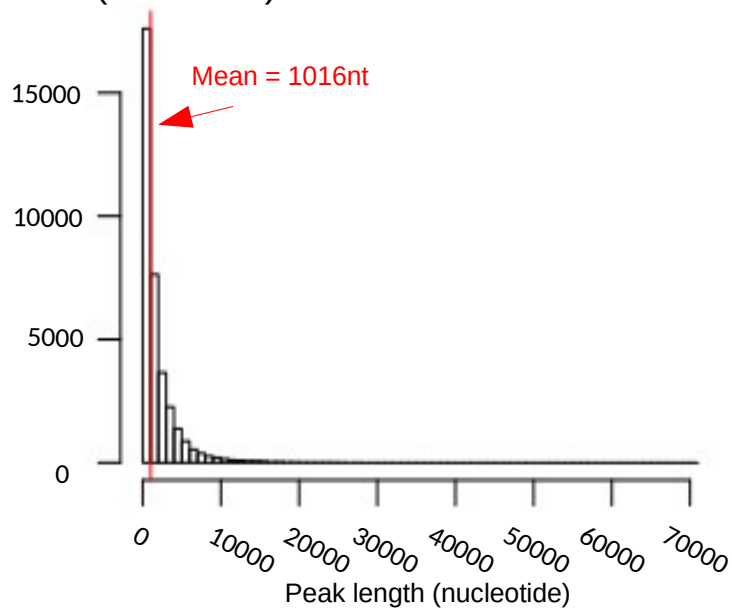

## B MACS2 H3K9me2 L4 peak detection (n= 30382)

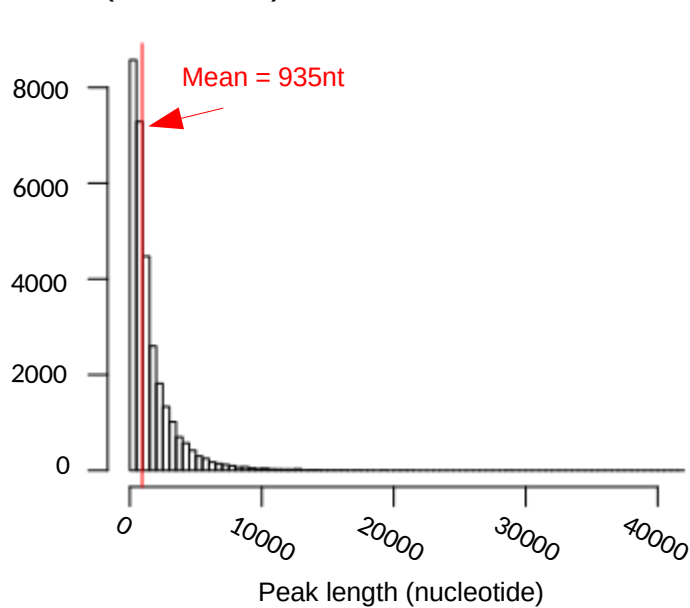

## C

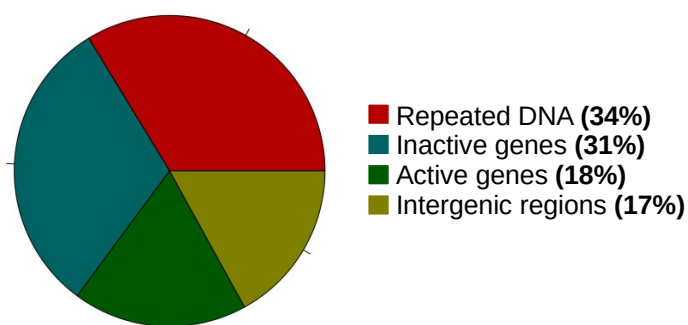

## D

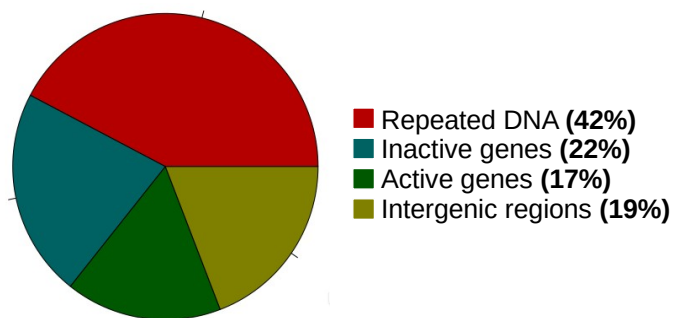

**A**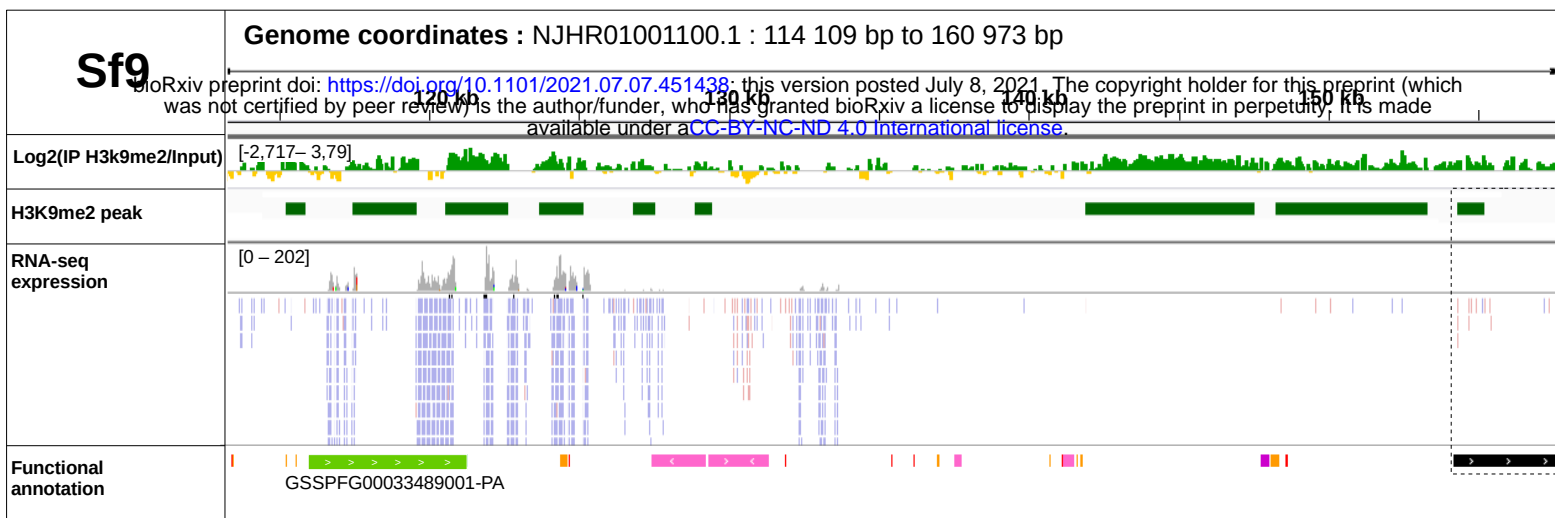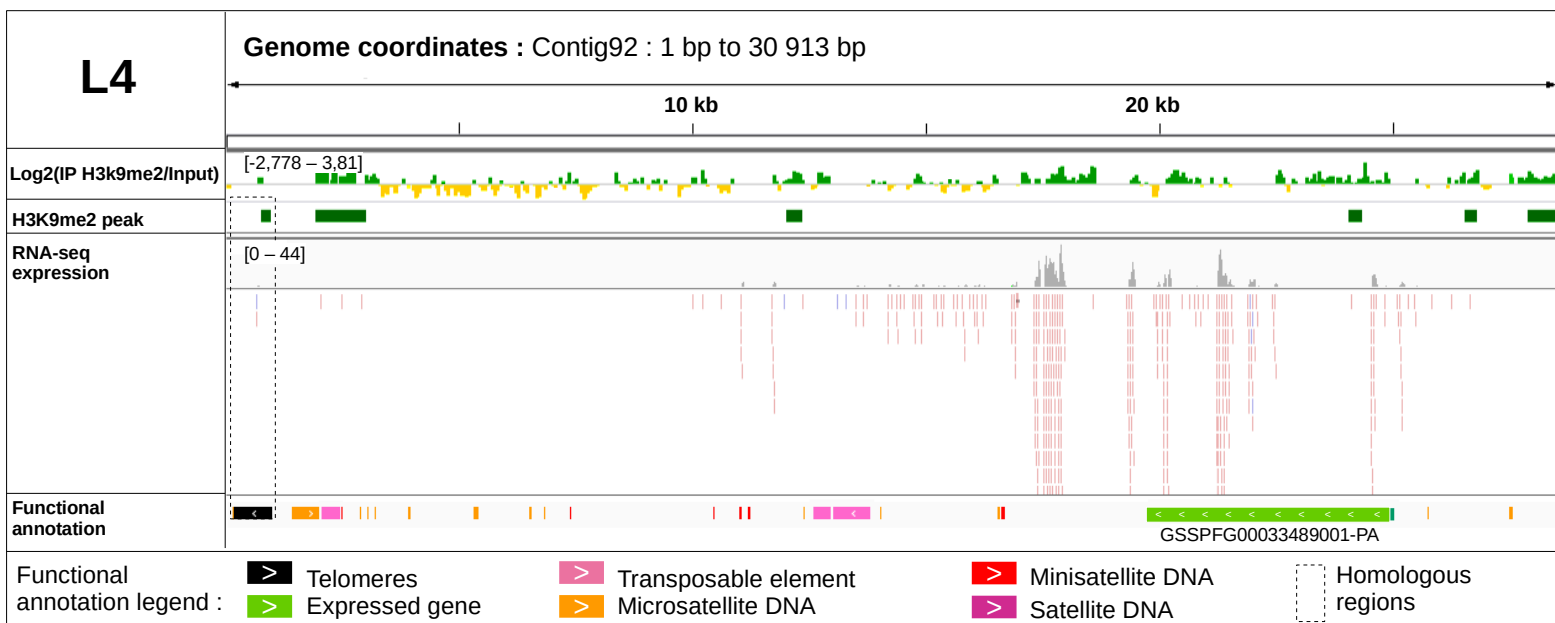**B**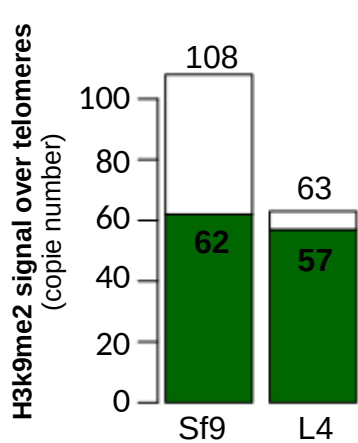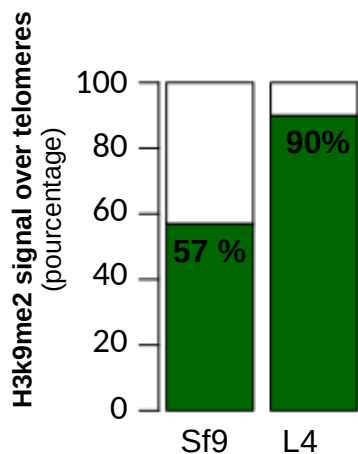**C**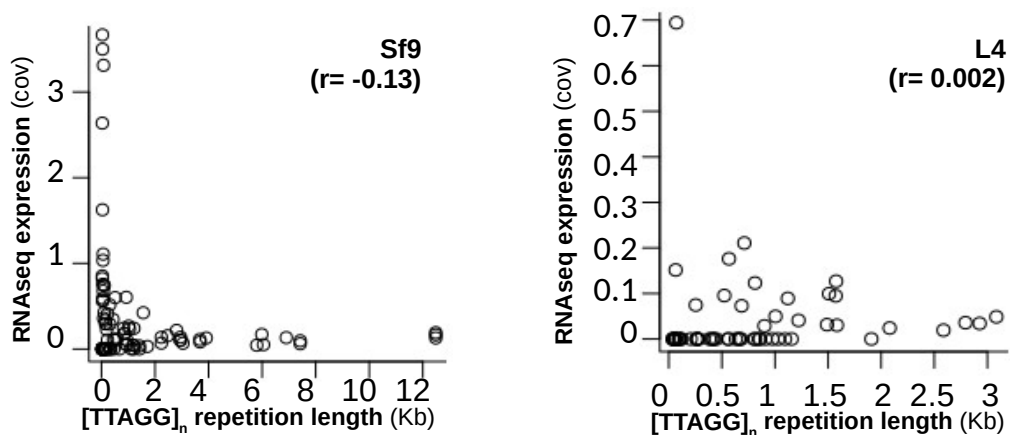**D**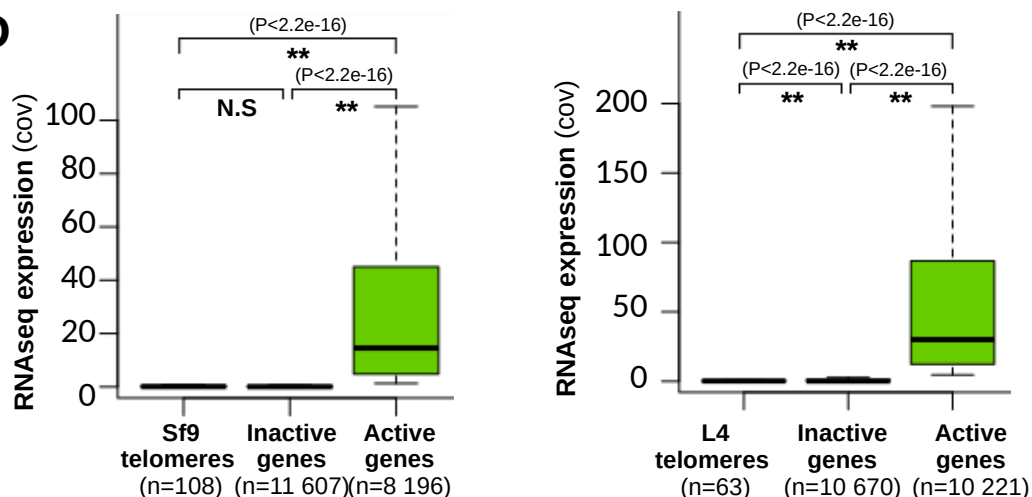

# Figure 3

A

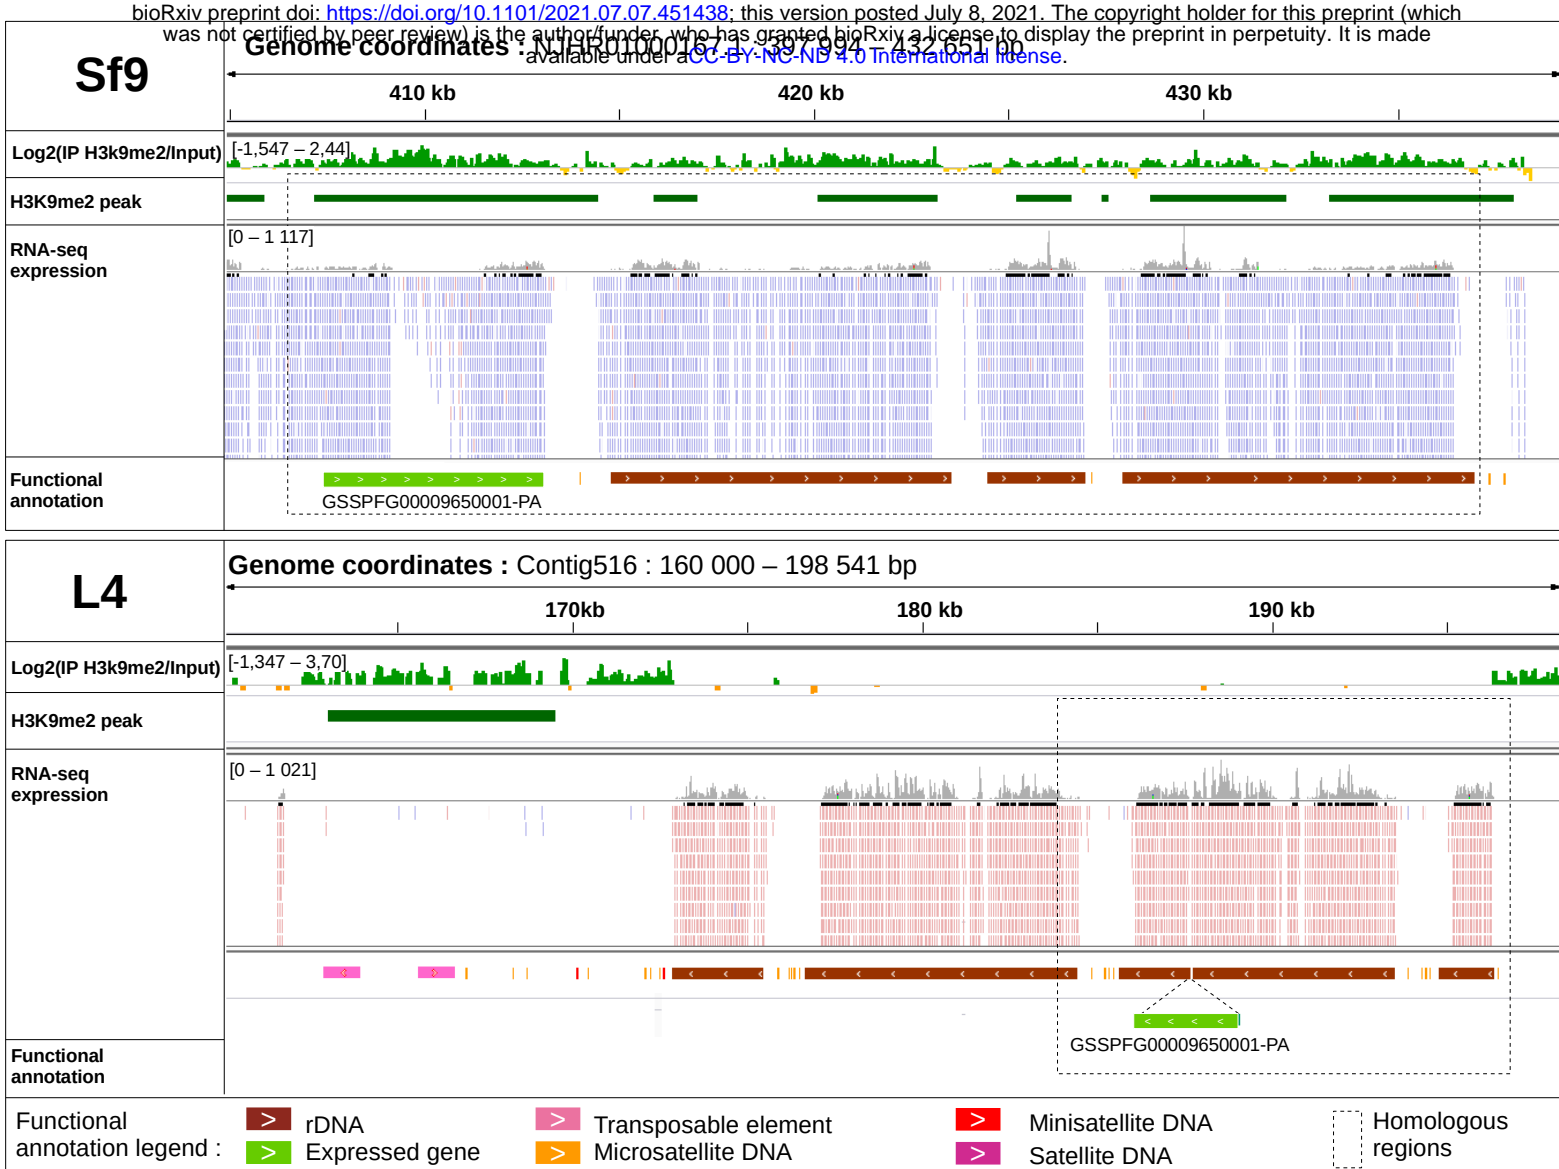

B

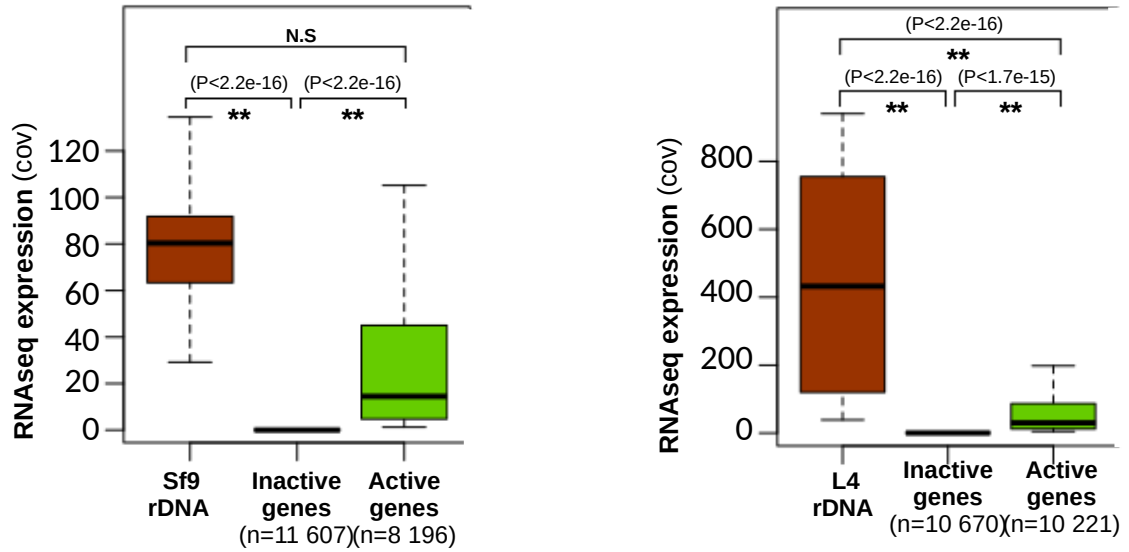

| Cluster | Satellite probability | Consensus length | Consensus                                                                                                                                      |
|---------|-----------------------|------------------|------------------------------------------------------------------------------------------------------------------------------------------------|
| 1       | 4.14e-08              | 150              | TTTATACTCCGTTAGAGCATTCTTTGTTACTAAATGTTTTATTATTGATATTATTTTTTCATACCTTTTACTATTATTACTTTTTTTTCGATGAATTAACAATAACATGAACCGAAGTCGTGTAACGATCGACATAGAATTA |

bioRxiv preprint doi: <https://doi.org/10.1101/2021.07.07.451438>; this version posted July 8, 2021. The copyright holder for this preprint (which was not certified by peer review) is the author/funder, who has granted bioRxiv a license to display the preprint in perpetuity. It is made available under aCC-BY-NC-ND 4.0 International license.

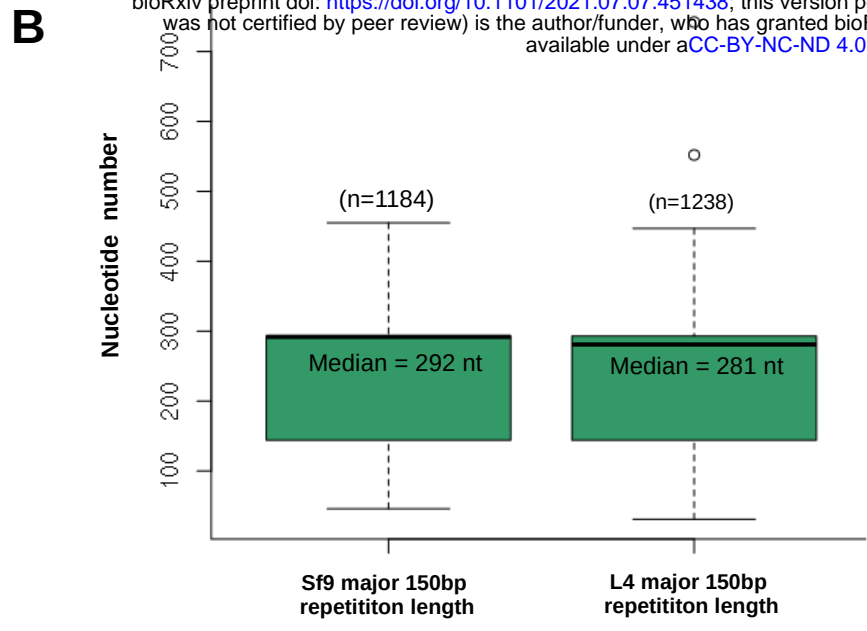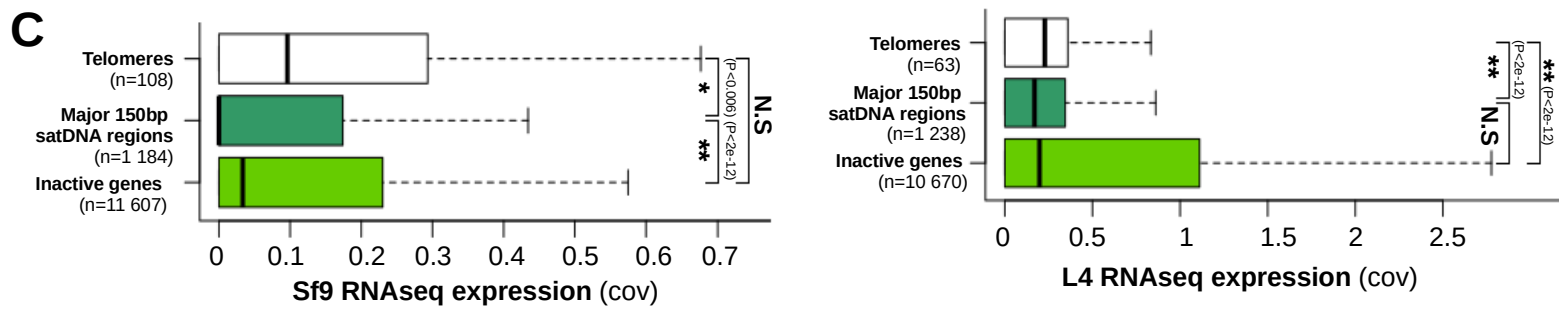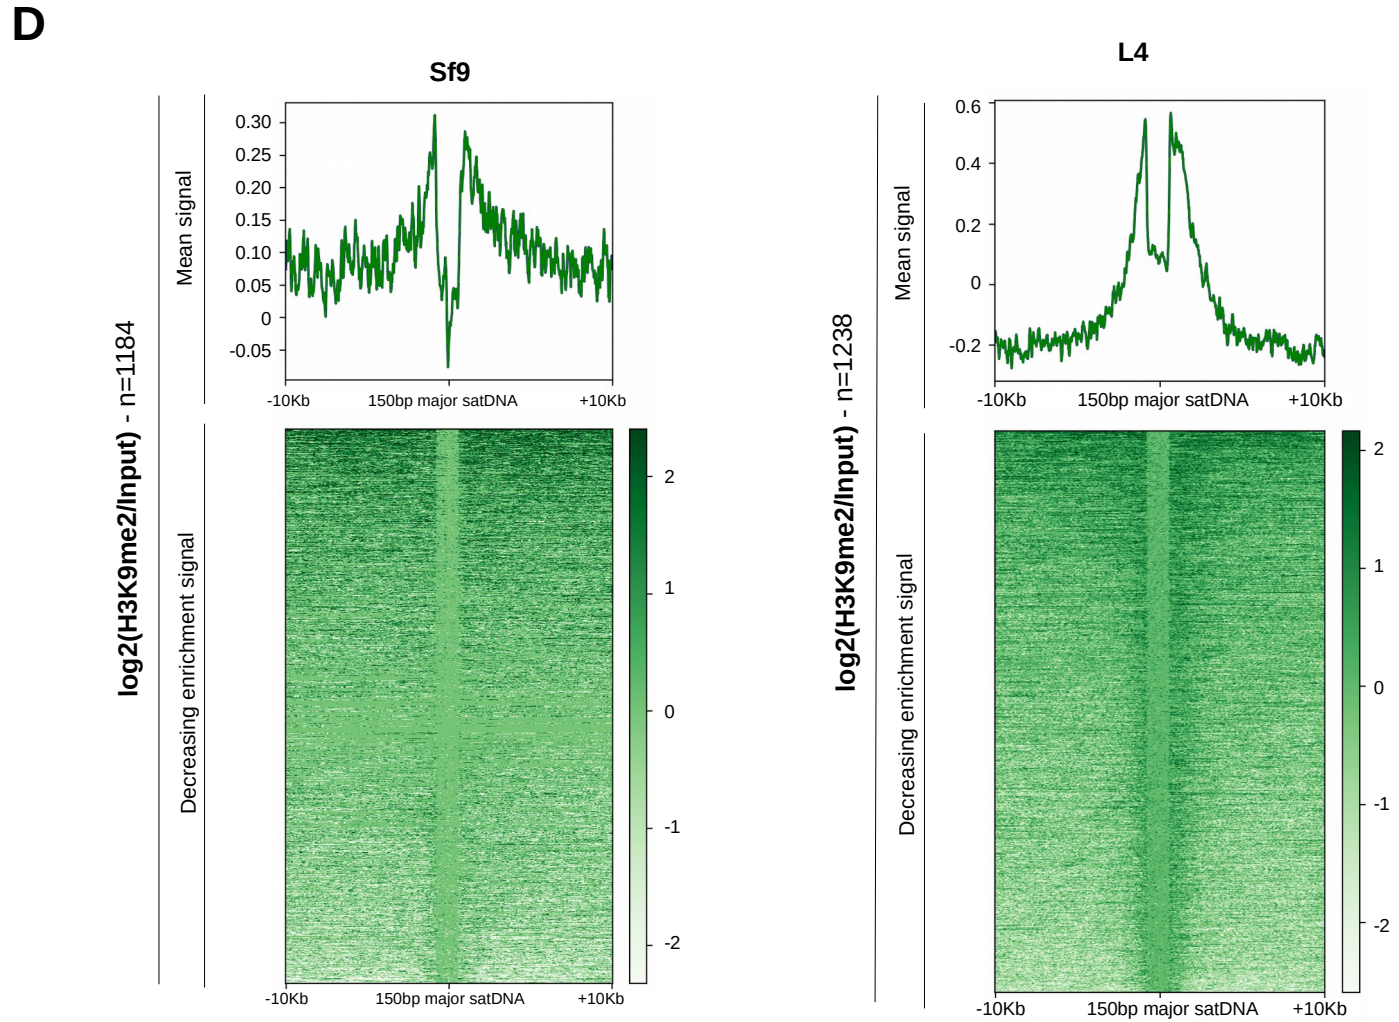

# Figure 5

**H3K9me2 association to repeat elements in Sf9 genome** **H3K9me2 association to repeat elements in L4 genome**

bioRxiv preprint doi: <https://doi.org/10.1101/357077>; this version posted July 8, 2019. The copyright holder for this preprint (which was not certified by peer review) is the author/funder, who has granted bioRxiv a license to display the preprint in perpetuity. It is made available under aCC-BY-NC-ND 4.0 International license.

**A**

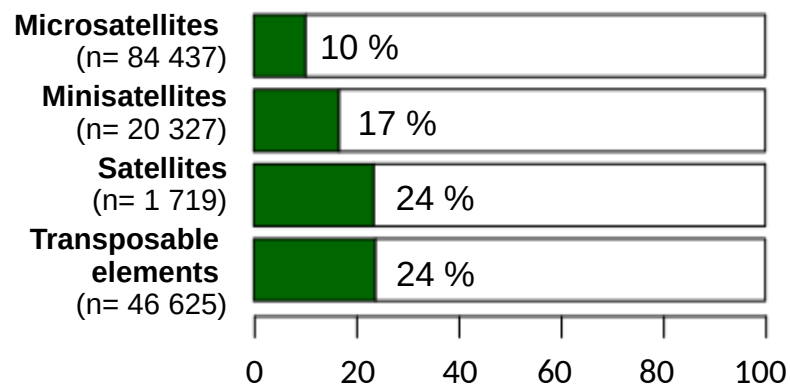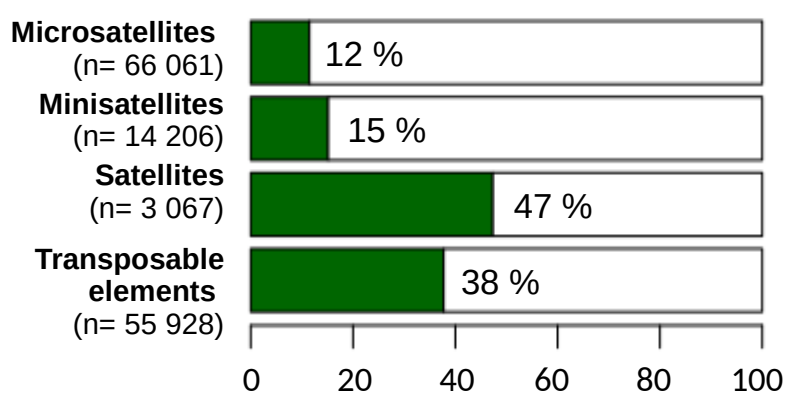

**B**

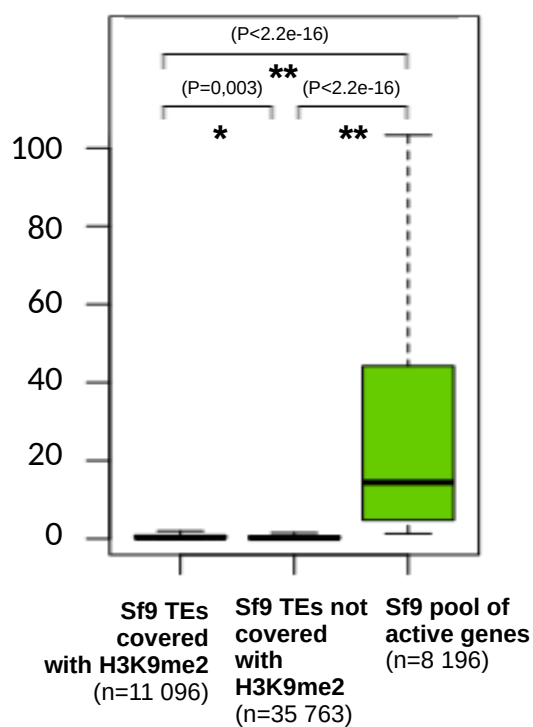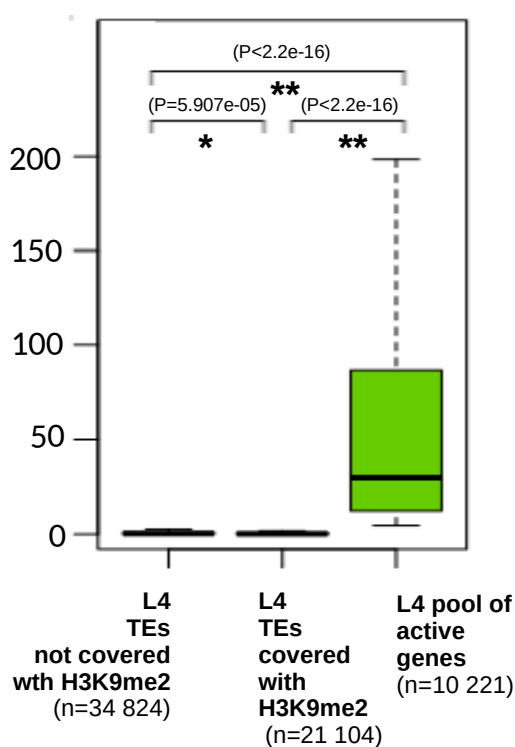

# Figure 6

**A**

H3K9me2 marks in Sf9 cells genes; this version posted July 8, 2021. The copyright holder for this preprint (which was not certified by peer review) is the author/funder, who has granted bioRxiv a license to display the preprint in perpetuity. It is made available under a [CC-BY-NC-ND 4.0 International license](https://creativecommons.org/licenses/by-nc-nd/4.0/).

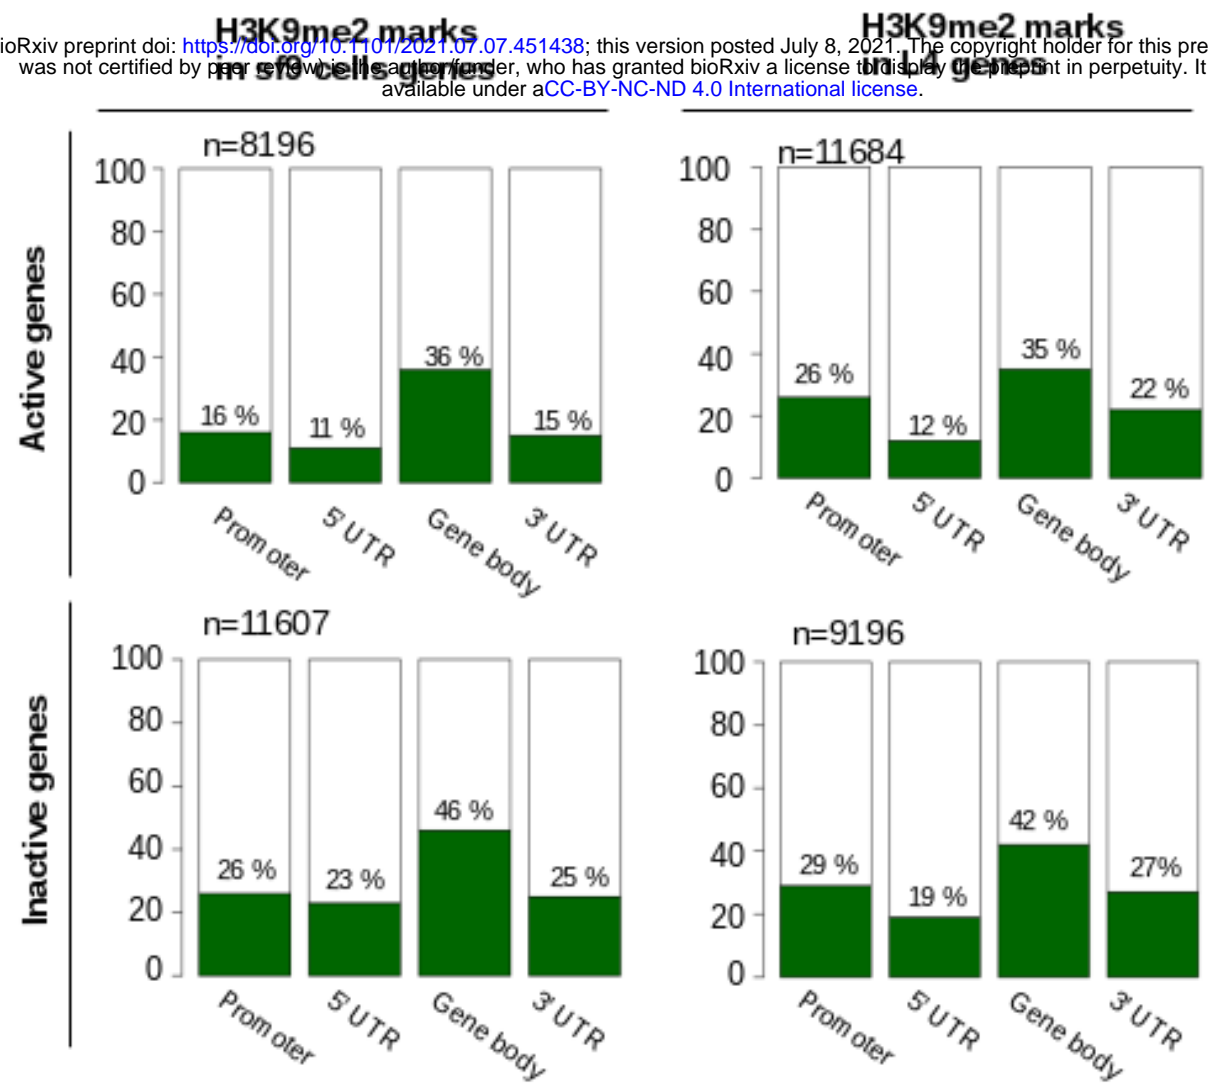

**B**

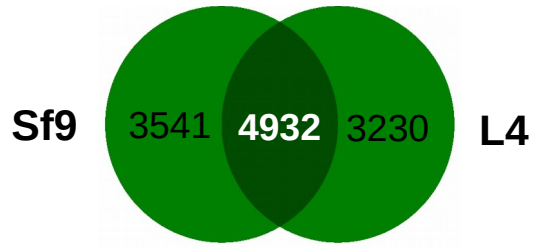



# Figure 7

## Sf9 cells gene bodies covered with H3K9me2

(n = 8473)

bioRxiv preprint doi: <https://doi.org/10.1101/2021.07.07.451438>; this version posted July 8, 2021. The copyright holder for this preprint (which was not certified by peer review) is the author/funder, who has granted bioRxiv a license to display the preprint in perpetuity. It is made available under a [CC-BY-NC-ND 4.0 International license](https://creativecommons.org/licenses/by-nc-nd/4.0/).

## L4 gene bodies covered with H3K9me2

(n = 8162)

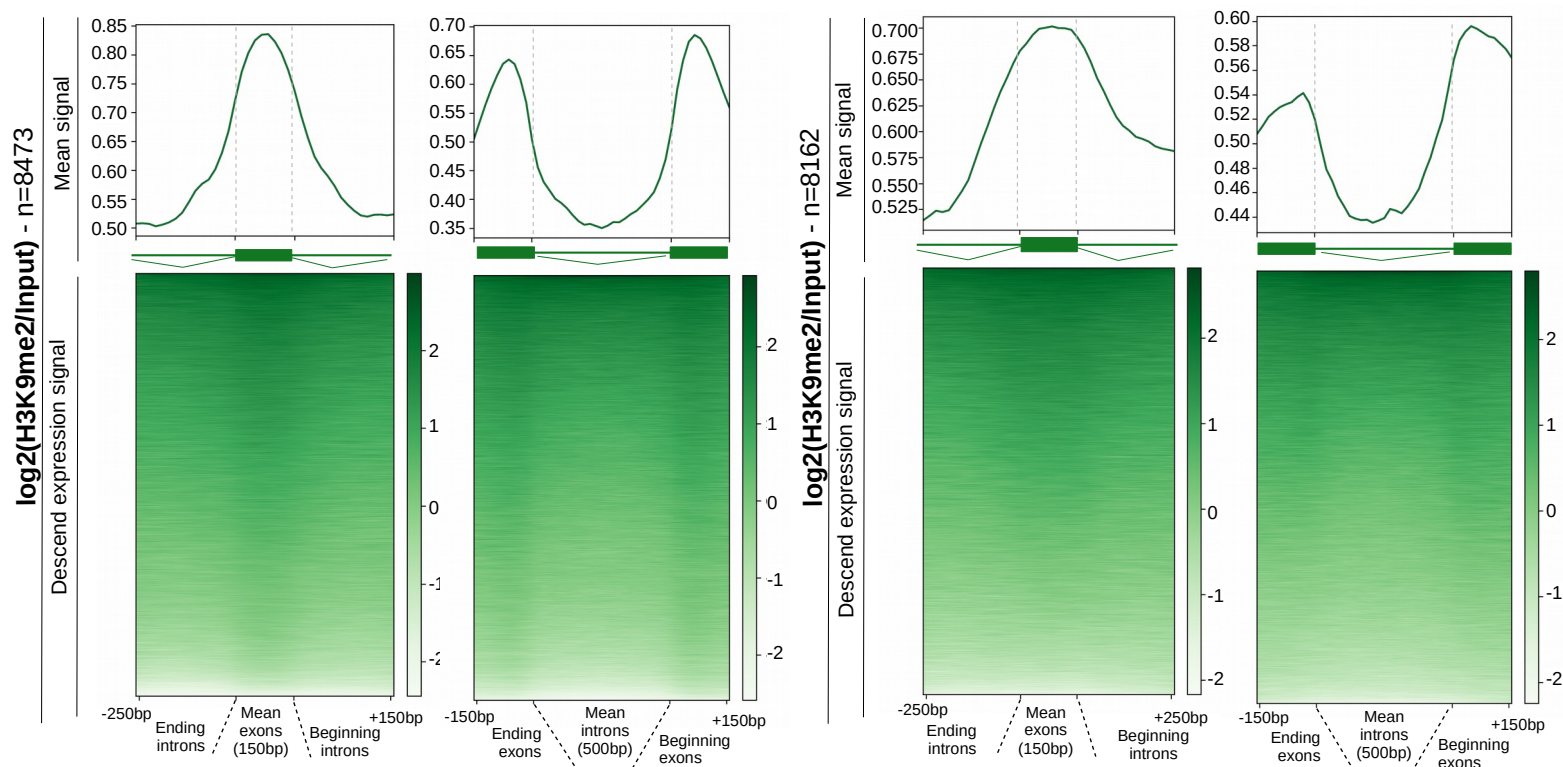

Source: https://www.biorxiv.org/content/10.1101/2021.07.07.451438v1.full.pdf
